# Supplementary material for: Manipulating molecules with strong coupling: harvesting triplet excitons in organic exciton microcavities
Source: Royal Society of Chemistry journal article supplement (doi:10.1039/c9sc04950a), 2019-11-27
Supplement: c9sc04950a1.pdf [file c9sc04950a1.pdf]

# Harvesting Light From Dark States of OLEDs in Reflective Cavity

Organic LEDs (OLEDs) emit light through the generation of singlet excitons...

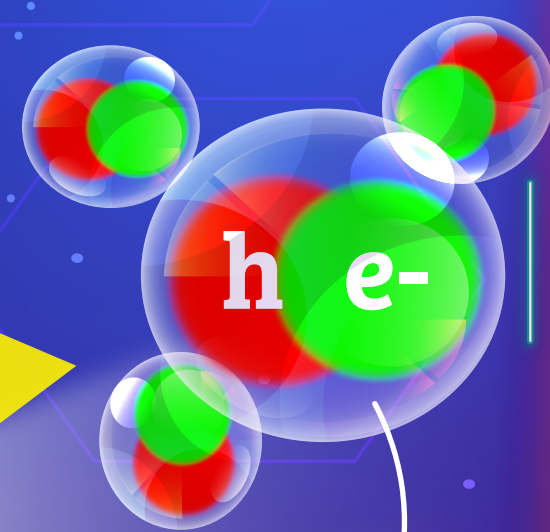

Bright singlet exciton

...but the abundance of dark triplet excitons are a potential drawback

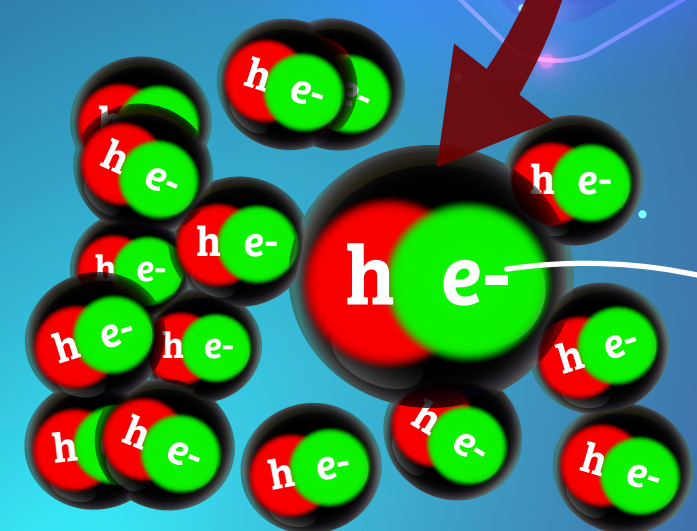

Dark triplet exciton

Can the dynamics of dark triplet excitons be manipulated for light emission?

Charge carriers trapped between two silver mirrors with light

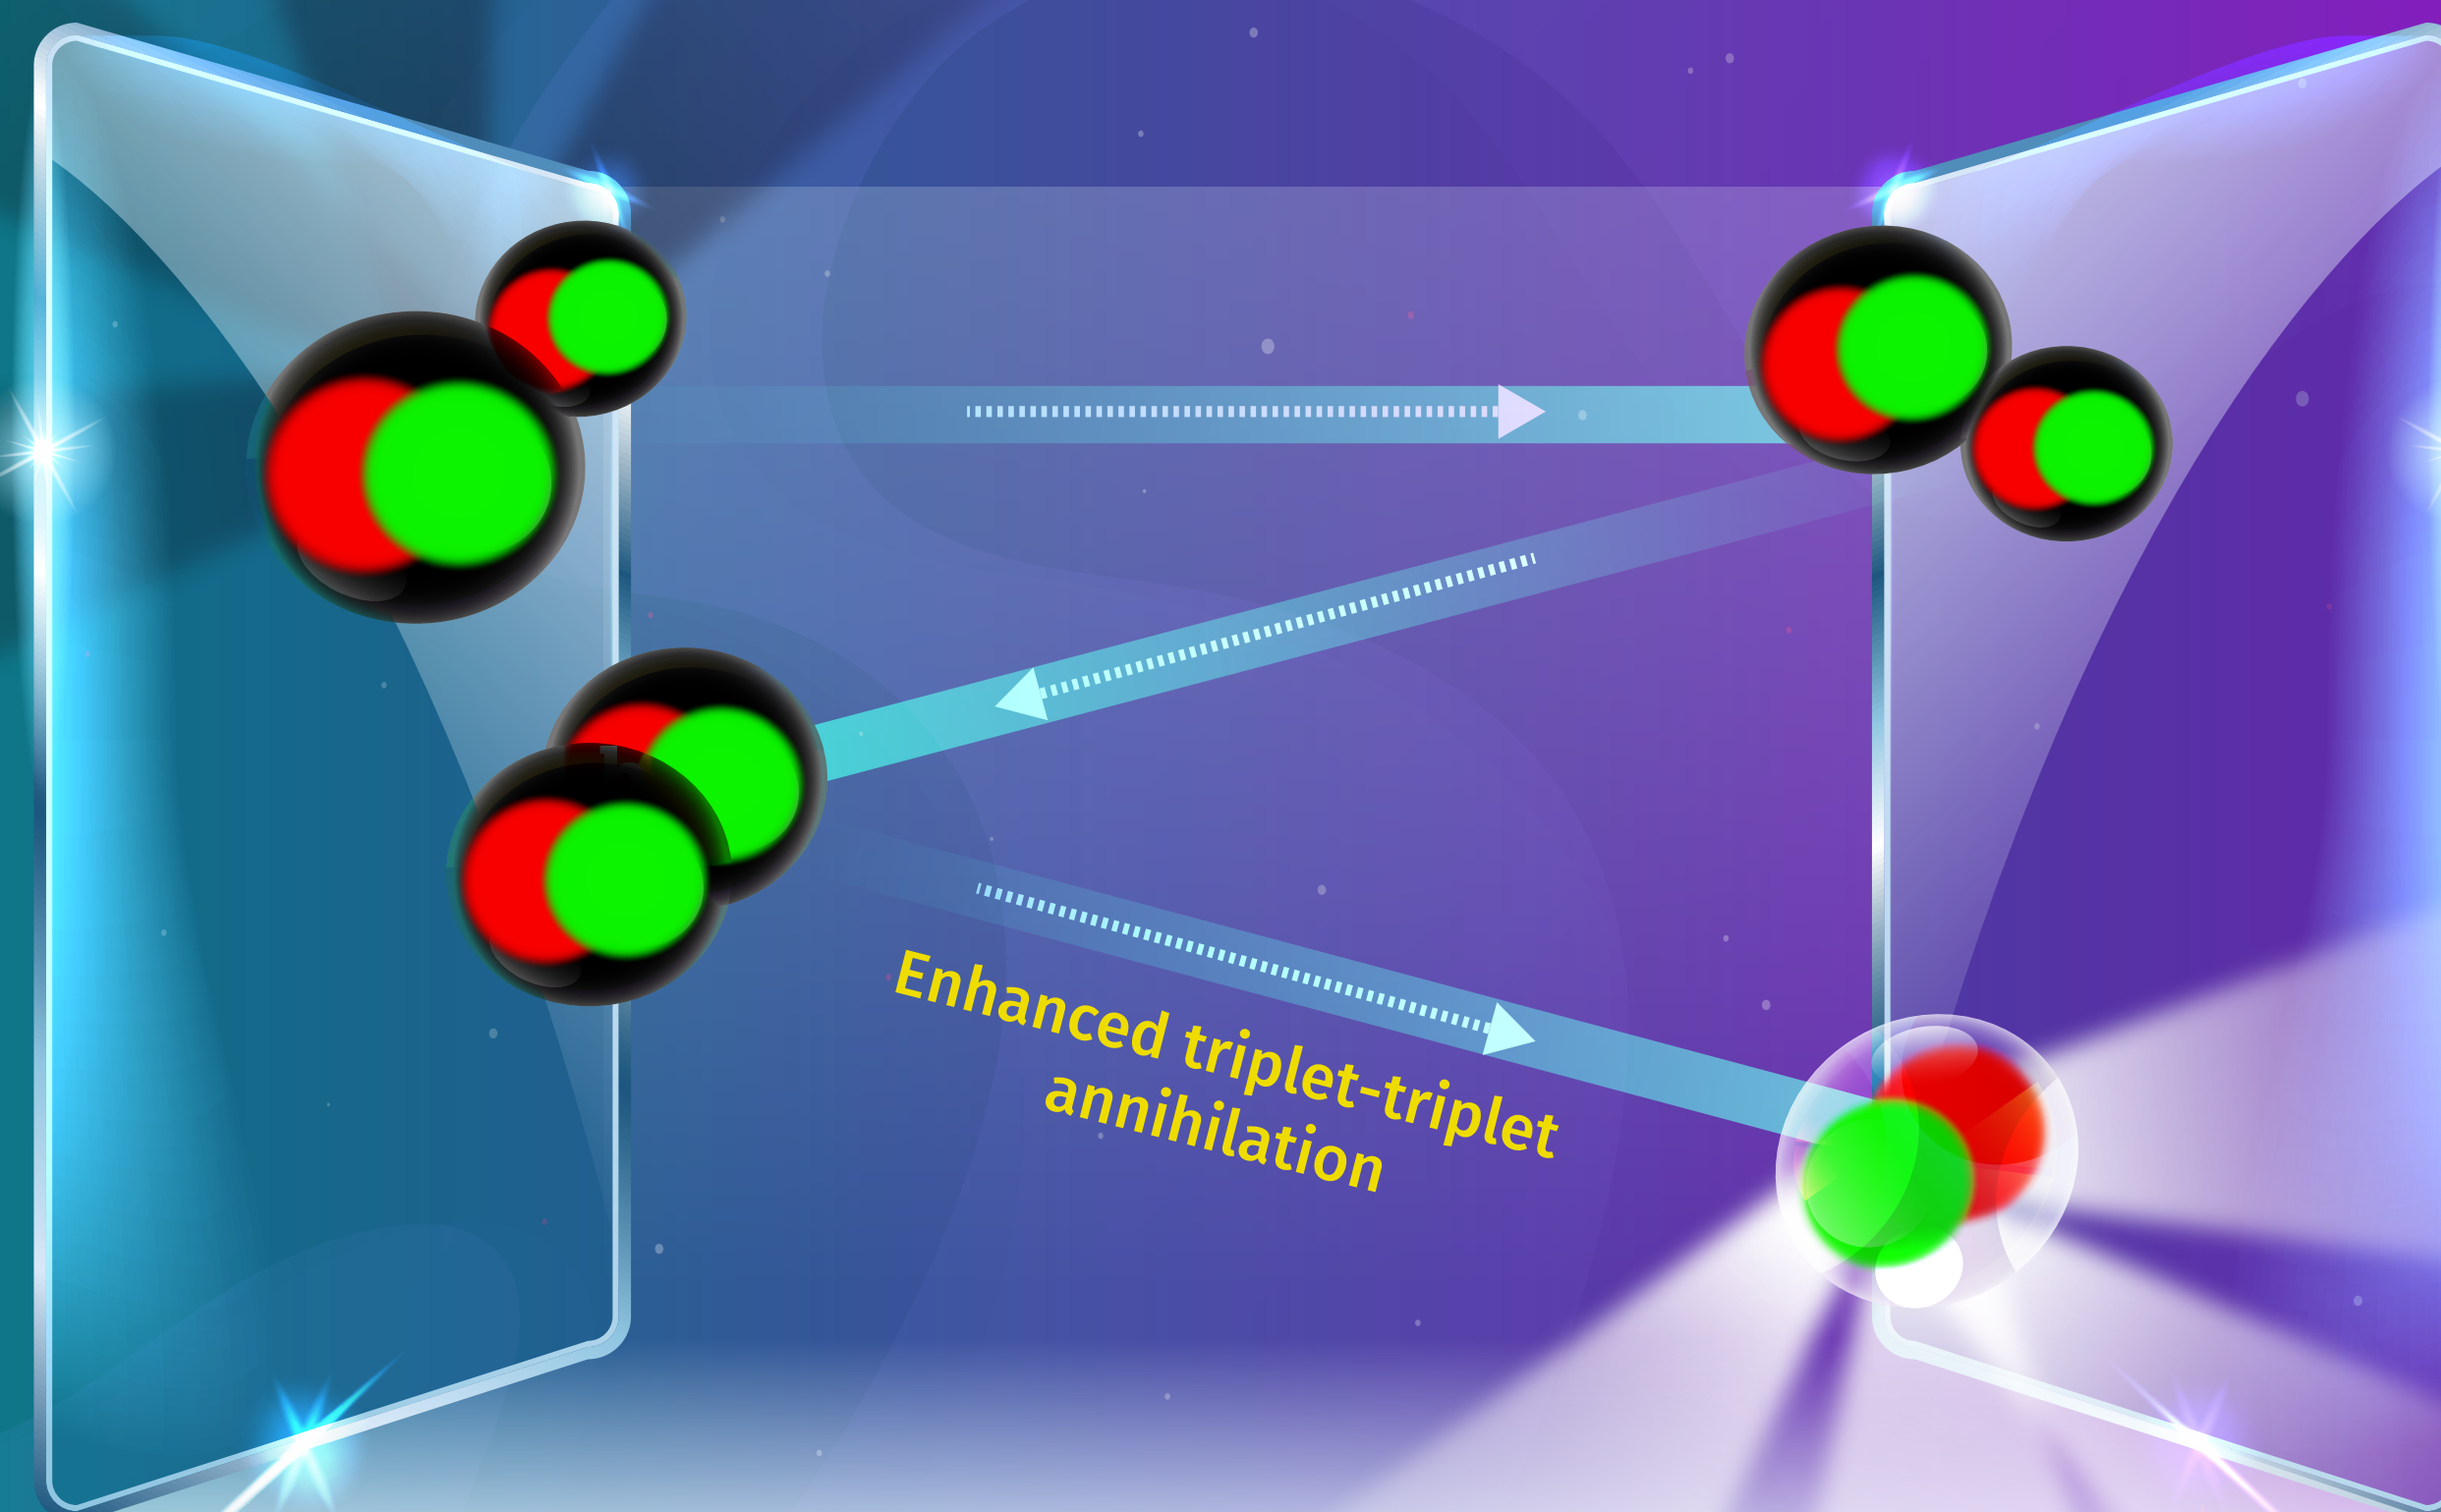

Dark exciton states converted to bright polariton states

Dark states of organic LED molecules in reflective cavity can be converted to bright states, significantly increasing the yield of light emitted

Chemical  
Science

PICK  
OF THE  
WEEK

Manipulating molecules with strong coupling:  
harvesting triplet excitons in organic exciton  
microcavities

Clark and Musser *et al.* (2019) | DOI:10.1039/C9SC04950A

ROYAL SOCIETY  
OF CHEMISTRY
