# Supplementary material for: Manipulating molecules with strong coupling: harvesting triplet excitons in organic exciton microcavities
Source: Royal Society of Chemistry journal article supplement (doi:10.1039/c9sc04950a), 2019-11-27
Supplement: c9sc04950a2.pdf [file c9sc04950a2.pdf]

# Supplementary Information for ‘Manipulating molecules with strong coupling: harvesting triplet excitons in organic exciton microcavities’

Daniel Polak<sup>1</sup>, Rahul Jayaprakash<sup>1</sup>, Thomas P Lyons<sup>1</sup>, Luis A. Martinez-Martinez<sup>2</sup>, Anastasia Leventis<sup>3</sup>, Kealan J Fallon<sup>3</sup>, Harriet Coulthard<sup>1</sup>, David G Bossanyi<sup>1</sup>, Kyriacos Georgiou<sup>1</sup>, Anthony J Petty II<sup>4</sup>, John Anthony<sup>4</sup>, Hugo Bronstein<sup>3</sup>, Joel Yuen-Zhou<sup>2</sup>, Alexander I Tartakovskii<sup>1</sup>, Jenny Clark<sup>1\*</sup> and Andrew J Musser<sup>1,5\*</sup>

<sup>1</sup> Department of Physics and Astronomy, University of Sheffield, Hicks Building, Hounsfield Road, Sheffield S3 7RH, UK

<sup>2</sup> Department of Chemistry and Biochemistry, University of California San Diego, La Jolla, California 92093, USA

<sup>3</sup> Department of Chemistry, University of Cambridge, Lensfield Road, Cambridge CB2 1EW, UK

<sup>4</sup> Department of Chemistry, University of Kentucky, Lexington, Kentucky 40506-0055, USA

<sup>5</sup> Department of Chemistry and Biochemistry, Cornell University, Ithaca, New York 14853, USA

\*email: [ajm557@cornell.edu](mailto:ajm557@cornell.edu), [jenny.clark@sheffield.ac.uk](mailto:jenny.clark@sheffield.ac.uk)

## Contents

|                                                                      |    |
|----------------------------------------------------------------------|----|
| 1. Methods.....                                                      | 3  |
| 1.1. Materials .....                                                 | 3  |
| 1.1.1. INDB synthesis.....                                           | 3  |
| 1.1.2. DPPT synthesis .....                                          | 8  |
| 1.1.3. TIPS-tetracene synthesis.....                                 | 9  |
| 1.2. Sample preparation .....                                        | 10 |
| 1.3. Steady-state measurements (absorption, PL, reflectivity) .....  | 10 |
| 1.4. Time-resolved photoluminescence.....                            | 11 |
| 1.5. Transfer matrix simulations .....                               | 12 |
| 2. Diphenylanthracene:Pt-porphyrin:polystyrene 50:1:15.....          | 13 |
| 3. Indolonaphthyridine benzene (INDB) – Triplet-free reference ..... | 15 |

|    |      |                                         |    |
|----|------|-----------------------------------------|----|
| 31 | 4.   | TIPS-tetracene.....                     | 17 |
| 32 | 4.1. | Solution-processed control samples..... | 18 |
| 33 | 4.2. | Fully evaporated control samples.....   | 19 |
| 34 | 4.3. | Detuning dependence.....                | 21 |
| 35 | 4.4. | Spectral/k-space evolution .....        | 24 |
| 36 | 5.   | Rate modeling.....                      | 25 |
| 37 | 6.   | Kinetic enhancement .....               | 32 |
| 38 | 7.   | References .....                        | 33 |
| 39 |      |                                         |    |
| 40 |      |                                         |    |

# 41 1. Methods

## 42 1.1. Materials

43 Diphenylanthracene, Pt-porphyrin, polystyrene, bathocuproine and all solvents were  
44 purchased from Sigma Aldrich and used without further purification. All samples were  
45 prepared on ultraflat glass slides coated with 20 nm synthetic quartz (Osilla). INDB, DPPT and  
46 TIPS-tetracene were synthesised as follows.

### 47 1.1.1. INDB synthesis

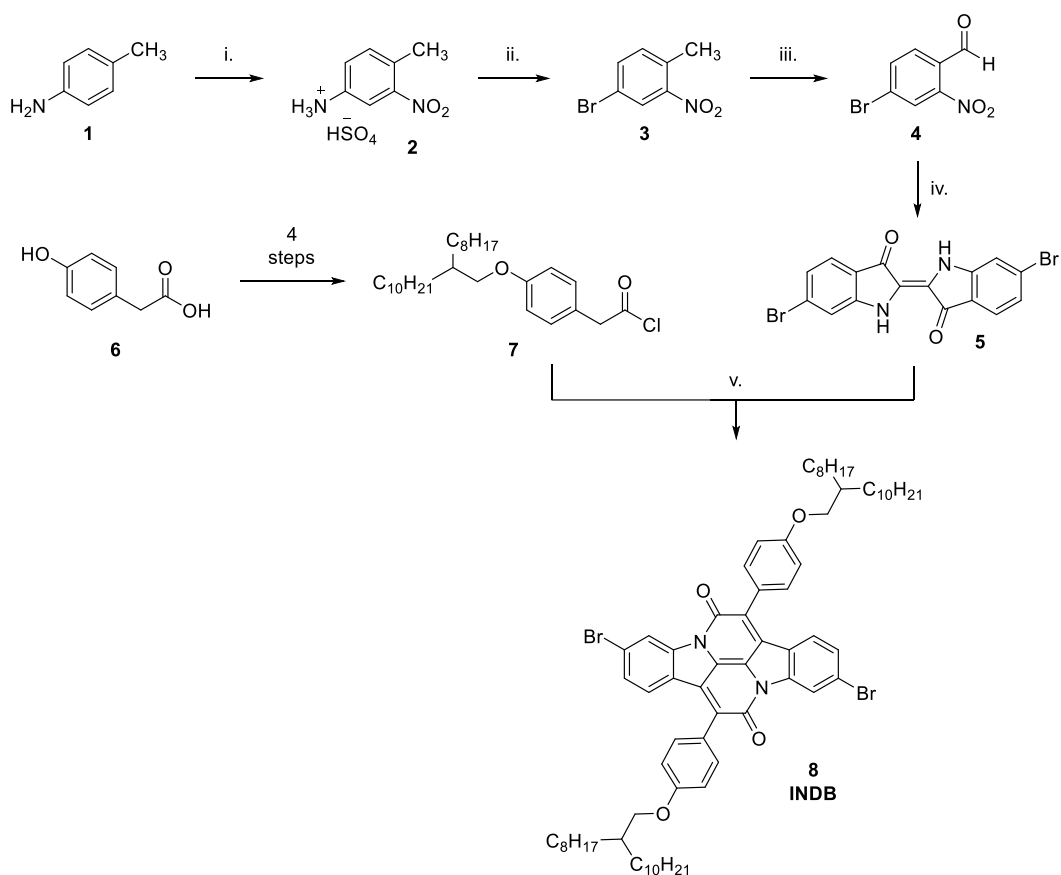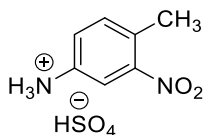

50

51 Under normal atmospheric conditions, *p*-toluidine (40.0 g, 0.37 mol) was cautiously  
52 dissolved in conc. H<sub>2</sub>SO<sub>4</sub> (110 mL) and cooled to -10 °C. A solution of nitric acid (19 mL,  
53 0.43 mol, 70%) in conc. H<sub>2</sub>SO<sub>4</sub> (70 mL) was added dropwise insuring the internal  
54 temperature did not rise above - 5 °C. After 6 h the reaction was poured onto crushed

55 ice (1 kg) precipitating a yellow solid which was collected by vacuum filtration and washed  
56 with cold water. The solid was dried thoroughly to give a pale-yellow solid (76.9 g, 83%).

57 A sample of solid was converted to 3-nitro-4-methylaniline for analysis.

58  $^1\text{H NMR}$  (600 MHz,  $\text{CDCl}_3$ )  $\delta$  7.28 (d,  $J = 2.5$  Hz, 1H), 7.07 (d,  $J = 8.2$  Hz, 1H), 6.80 (dd,  $J =$   
59 8.2, 2.5 Hz, 1H), 3.84 (s, 2H), 2.45 (s, 3H) **LRMS** ( $\text{Cl}^+$ )  $m/z$  153 [ $\text{MH}$ ] $^+$

#### 60 **4-Bromo-2-nitromethylbenzene (3)**

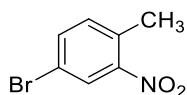

62 Under normal atmospheric conditions, 3-nitro-4-methylphenylammonium hydrosulfate  
63 (29.5 g, 0.12 mol) was dissolved in water (129 mL) and hydrobromic acid (38.5 mL, 0.34  
64 mol, 48%) and cooled to  $-5$  °C. A cold solution of sodium nitrite (15.2 g, 0.22 mol) in water  
65 (40 mL) was added slowly, maintaining the temperature below 0 °C, and the reaction  
66 stirred for 30 min. Separately, copper(I) bromide (17.2 g, 0.12 mol) in hydrobromic acid  
67 (23.8 mL, 0.21 mol, 48%) was heated to reflux. The cold diazonium salt was added  
68 portionwise to the copper solution, liberating gaseous nitrogen dioxide. Following  
69 complete addition, the reaction was heated at reflux for 2 h, cooled and extracted with  
70 diethyl ether ( $3 \times 100$  mL). The combined organic extracts were successively washed with  
71 5% ammonium hydroxide solution ( $2 \times 100$  mL), water (100 mL) and brine (100 mL), dried  
72 over  $\text{MgSO}_4$  and concentrated *in vacuo* to give a brown oil from which a brown solid  
73 separated. Recrystallisation from ethanol yielded 14.8 g (57%) of the title compound as  
74 a brown crystalline solid.

75  $^1\text{H NMR}$  (600 MHz,  $\text{CDCl}_3$ )  $\delta$  8.12 (d,  $J = 2.0$  Hz, 1H), 7.62 (dd,  $J = 8.2, 2.0$  Hz, 1H), 7.23 (d,  
76  $J = 8.2$  Hz, 1H), 2.55 (s, 3H) **LRMS** ( $\text{Cl}^+$ )  $m/z$  217/215 [ $\text{MH}$ ] $^+$

#### 77 **4-Bromo-2-nitrobenzaldehyde (4)**

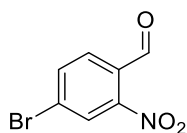

79 To a solution of 4-bromo-2-nitromethylbenzene (27.5 g, 0.13 mol) in anhydrous DMF (130  
80 mL) under argon was added *N,N*-dimethylformamide dimethyl acetal (50.6 mL, 0.38 mol).  
81 The reaction was heated at 135 °C for 24 h. Separately, sodium periodate (81.5 g, 0.38  
82 mol) was dissolved in a 2:1 mixture of  $\text{H}_2\text{O}$ :DMF (380 mL). The cooled red enamine  
83 intermediate added dropwise to the vigorously stirring periodate solution at RT. If stirring  
84 became prevented due to viscosity,  $\text{H}_2\text{O}$ /DMF (2:1) was added until stirring resumed. The  
85 reaction was stirred for 3 h at RT and then filtered. The filter cake was washed thoroughly  
86 with toluene (300 mL). From the filtrate, the organic layer was separated and washed

87 with water (2 × 200 mL) then brine (2 × 200 mL), dried over MgSO<sub>4</sub> and concentrated *in*  
88 *vacuo* to give an oil to which hexane was added to crystallise the aldehyde (19.6 g, 67%).  
89 If the reader obtained a solid following concentration, the crude residue is best purified  
90 by dry-flash chromatography eluting with 10% ethyl acetate in hexane.

91 <sup>1</sup>H NMR (400 MHz, CDCl<sub>3</sub>) δ 10.39 (s, 1H), 8.27 (d, *J* = 1.8 Hz, 1H), 7.93 (dd, *J* = 8.3, 1.4 Hz,  
92 1H), 7.85 (d, *J* = 8.3 Hz, 1H) LRMS (CI+) *m/z* 232/230 [M]<sup>+</sup>

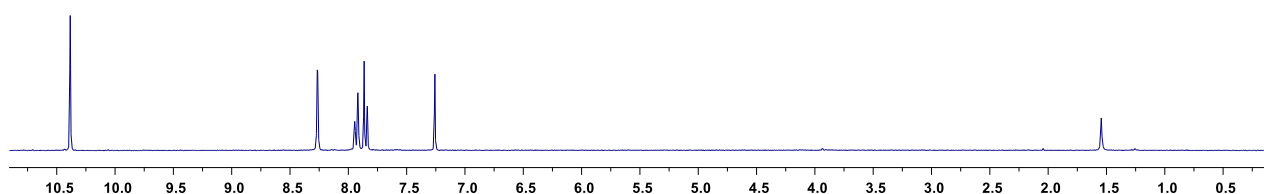

93

94 **(E)-6,6'-dibromo-[2,2'-biindolinylidene]-3,3'-dione (6,6'-dibromoindigo) (5)**

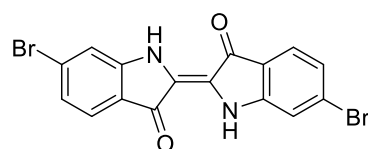

95

96 Under normal atmospheric conditions, 4-bromo-2-nitrobenzaldehyde (20 g) was  
97 dissolved in acetone (200 mL) and water (200 mL) was added dropwise with vigorous  
98 stirring to create a fine suspension. A 1M sodium hydroxide solution (100 mL) was added  
99 dropwise, precipitating the purple indigoid. Once addition was complete the reaction was  
100 stirred overnight then filtered and washed with acetone. The purple solid was dried  
101 thoroughly to give 10.4 g of the title compound (58%).

102 <sup>1</sup>H NMR (600 MHz, DMSO) δ 7.57 (d, *J* = 8.1 Hz, 2H), 7.55 (s, *J* = 1.1 Hz, 2H), 7.12 (d, *J* =  
103 8.1 Hz, 2H) HRMS Found (EI): [M]<sup>+</sup> 417.8957, C<sub>16</sub>H<sub>8</sub>Br<sub>2</sub>N<sub>2</sub>O<sub>2</sub> requires 417.8953

104 **Ethyl 2-(4-hydroxyphenyl)acetate (6)**

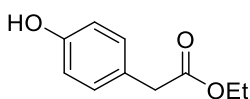

105

106 Under normal atmospheric conditions, a solution of 2-(4-hydroxyphenyl)acetic acid (10  
107 g, 65.7 mmol) in ethanol (120 mL) and conc. H<sub>2</sub>SO<sub>4</sub> (1 mL) was heated to reflux for 4 h  
108 then cooled and diluted with water (240 mL). The solution was extracted with diethyl  
109 ether (3 × 50 mL) and the combined organic extracts were washed with brine (2 × 50 mL),  
110 dried over MgSO<sub>4</sub> and concentrated *in vacuo* to give the title compound as a light-yellow  
111 oil (11.7 g, 99%).

112 <sup>1</sup>H NMR (400 MHz, CDCl<sub>3</sub>) δ 7.12 (d, *J* = 8.6, 2H), 6.74 (d, *J* = 8.6, 2H), 4.15 (q, *J* = 7.1,  
113 2H), 3.54 (s, 2H), 1.25 (t, *J* = 7.1, 3H) LRMS (EI+) *m/z* 180 [M]<sup>+</sup>

114 **Ethyl 2-(4-((2-octyldodecyl)oxy)phenyl)acetate**

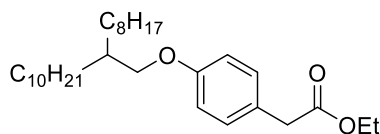

115  
 116 To a solution of ethyl 2-(4-hydroxyphenyl)acetate (11.6 g, 64 mmol) and 2-octyldodecyl  
 117 bromide (29.7 g, 82 mmol) in anhydrous DMF (330 mL) under argon was added potassium  
 118 carbonate (27.6 g, 0.2 mol). The reaction was heated at 80 °C for 12 h, then neutralised  
 119 by the addition of 6M hydrochloric acid (20 mL). The suspension was filtered, and the  
 120 filtrate was extracted with diethyl ether (3 × 100 mL). The combined organic extracts  
 121 were washed with water (2 × 100 mL) then brine (2 × 100 mL), dried over MgSO<sub>4</sub> and  
 122 concentrated *in vacuo*. The crude residue was purified by dry-flash chromatography  
 123 eluting initially with hexane to remove excess 2-octyldodecyl bromide, then with 10%  
 124 ethyl acetate in hexane to give the title compound as a pale-yellow oil (19.3 g, 64%).

125 <sup>1</sup>H NMR (400 MHz, CDCl<sub>3</sub>) δ 7.18 (d, *J* = 8.7, 2H), 6.85 (d, *J* = 8.7, 2H), 4.14 (q, *J* = 7.1, 2H),  
 126 3.80 (d, *J* = 5.7, 2H), 3.54 (s, 2H), 1.82 – 1.68 (m, 1H), 1.48 – 1.38 (m, 2H), 1.38 – 1.18 (m,  
 127 33H), 0.93 – 0.82 (m, 6H) <sup>13</sup>C NMR (100 MHz, CDCl<sub>3</sub>) δ 172.1, 158.6, 130.2, 125.9, 114.6,  
 128 70.9, 60.9, 40.6, 38.0, 32.0, 31.4, 30.1, 29.8, 29.7, 29.4, 26.9, 22.8, 22.7, 14.3, 14.2 **HRMS**  
 129 Found (CI+): [M]<sup>+</sup> 460.3912, C<sub>30</sub>H<sub>52</sub>O<sub>3</sub> requires 460.3911

130 **2-(4-((2-Octyldodecyl)oxy)phenyl)acetic acid**

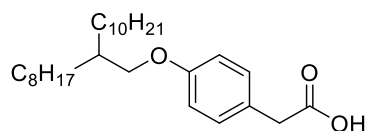

131  
 132 Under normal atmospheric conditions, aqueous sodium hydroxide (4M, 80 mL) was  
 133 added to ethyl 2-(4-((2-octyldodecyl)oxy)phenyl)acetate (19.2 g, 42 mmol) in ethanol (80  
 134 mL) at RT. After 4 h the reaction was acidified, and the solution extracted with diethyl  
 135 ether (3 × 100 mL). The combined organic extracts were washed with brine (2 × 50 mL),  
 136 dried over MgSO<sub>4</sub> and concentrated *in vacuo* to give the title compound as a pale-yellow  
 137 oil that solidified partially on standing (17.9 g, 99%).

138 <sup>1</sup>H NMR (400 MHz, CDCl<sub>3</sub>) δ 7.18 (d, *J* = 8.7, 2H), 6.85 (d, *J* = 8.7, 2H), 3.80 (d, *J* = 5.7, 2H),  
 139 3.58 (s, 2H), 1.81 – 1.70 (m, 1H), 1.48 – 1.38 (m, 2H), 1.38 – 1.19 (m, 31H), 0.88 (t, *J* = 6.8,  
 140 6H) <sup>13</sup>C NMR (100 MHz, CDCl<sub>3</sub>) δ 177.3, 158.8, 130.4, 125.0, 114.7, 70.9, 40.1, 38.0, 32.0,  
 141 31.4, 30.1, 29.8, 29.7, 29.4, 26.9, 22.8, 22.8, 14.2 **HRMS** Found (EI+): [M]<sup>+</sup> 432.3599,  
 142 C<sub>28</sub>H<sub>48</sub>O<sub>3</sub> requires 432.3598

143 **3,10-Dibromo-7,14-bis(4-((2-octyldodecyl)oxy)phenyl)diindolo[3,2,1-*de*:3',2',1'-**  
 144 ***ij*][1,5]naphthyridine-6,13-dione**

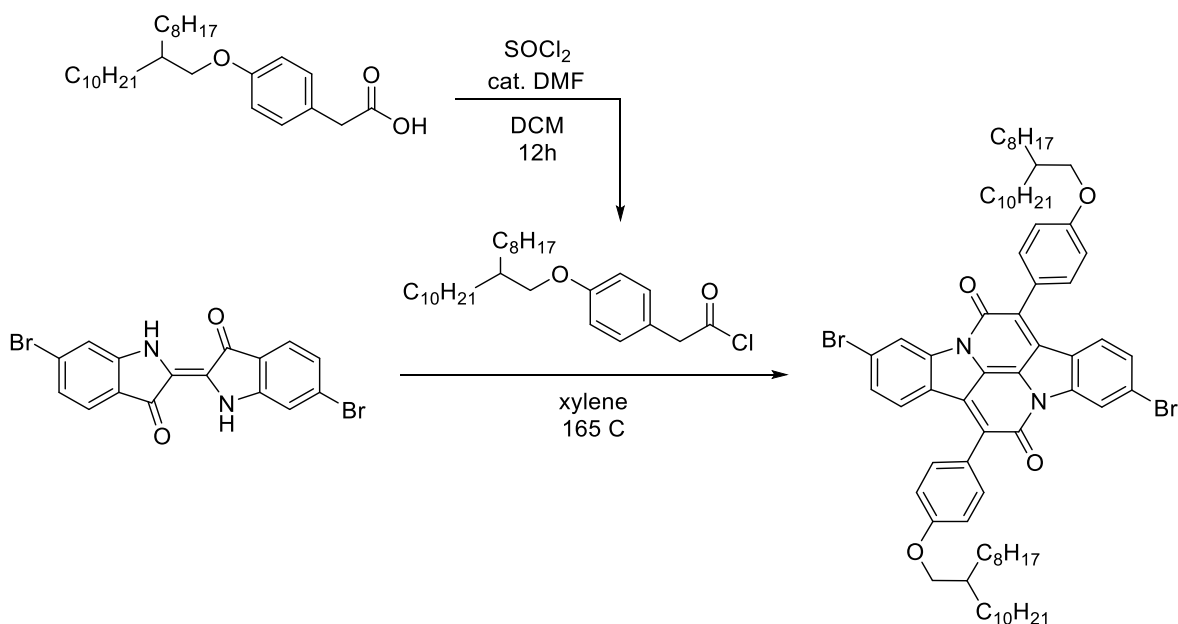

145

146 To a solution of 2-(4-((2-octyldodecyl)oxy)phenyl)acetic acid (24 g, 55.5 mmol) in  
 147 anhydrous DCM (55 mL) was added catalytic anhydrous DMF (0.1 mL) and thionyl  
 148 chloride (12.2 mL, 0.167 mol). The reaction was heated at reflux for 2 h and total  
 149 conversion confirmed by NMR. All volatiles were carefully removed *in vacuo* to give the  
 150 corresponding acyl chloride (**7**) quantitatively which was used immediately without further  
 151 purification.

152 To a suspension of 6,6'-dibromoindigo (5.8 g, 14 mmol) in xylenes (185 mL) was heated  
 153 to 165 °C. Acyl chloride **2** (55.5 mmol) was added in one portion and the reaction heated  
 154 for 24 h. Xylenes were removed *in vacuo* and the resulting crude residue purified by dry-  
 155 flash chromatography eluting with 40% chloroform in hexanes. Fractions containing the  
 156 product ( $R_F = 0.2$ , pink) were combined and concentrated *in vacuo* to give a residue which  
 157 was then washed with ethyl acetate and the insoluble red solid collected by vacuum  
 158 filtration (0.95 g, 6%).

159  $^1\text{H NMR}$  (600 MHz,  $\text{CDCl}_3$ )  $\delta$  8.72 (d,  $J = 1.8$  Hz, 2H), 7.65 (d,  $J = 8.8$  Hz, 4H), 7.58 (d,  $J = 8.5$   
 160 Hz, 2H), 7.37 (dd,  $J = 8.5, 1.8$  Hz, 2H), 7.09 (d,  $J = 8.8$  Hz, 4H), 3.96 (d,  $J = 5.6$  Hz, 4H), 1.90  
 161 – 1.78 (m, 2H), 1.50 – 1.21 (m, 64H), 0.89 (td,  $J = 7.0, 5.3$  Hz, 12H)  $^{13}\text{C NMR}$  (150 MHz,  
 162  $\text{CDCl}_3$ )  $\delta$  160.6, 159.6, 145.1, 131.7, 131.0, 130.6, 129.3, 126.3, 126.2, 125.1, 124.5, 122.1,  
 163 121.1, 114.7, 71.2, 38.1, 32.1, 31.5, 30.2, 29.8, 29.5, 27.0, 22.8, 14.3 **HRMS** Found (EI):  
 164  $[\text{MH}]^+$  1211.5818,  $\text{C}_{72}\text{H}_{97}\text{Br}_2\text{N}_2\text{O}_4$  requires 1211.5815

165

166 **1.1.2. DPPT synthesis**

167

168

169

170

171

172

173

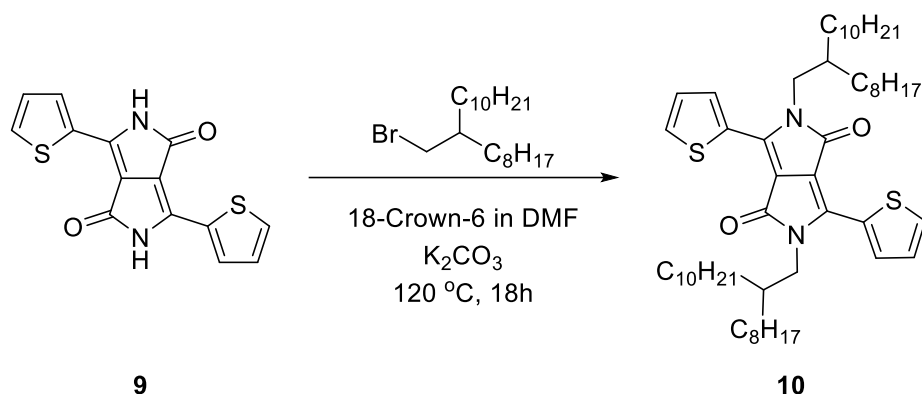

174 **3,6-Di(thiophen-2-yl)-2,5-dihydropyrrolo[3,4-c]pyrrole-1,4-dione (9)**

175

176

177

178

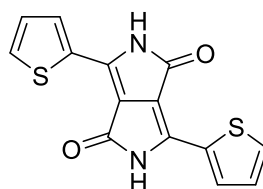

179 A flask containing sodium chunks (3.24 g, 140 mmol), 2-methyl-2-butanol (75 mL), and anhydrous  
180 iron (III) chloride (0.14 g, 0.863 mmol) was stirred at 150 °C under argon until all sodium was  
181 consumed (~30 min). The reaction was cooled to ~85 °C before thiophene-2-carbonitrile (8.5 mL,  
182 91.3 mmol) was added, followed by diethylsuccinate (6.9 mL, 41.5 mmol). The mixture turned  
183 magenta in colour and was left to stir at 90 °C overnight. The mixture was allowed to cool to 50  
184 °C and then methanol (122 mL) was added. The reaction was quenched with glacial acetic acid  
185 (36.6 mL) and refluxed for 45 min. The mixture was then filtered, washed with water (50 mL),  
186 acetone (50 mL), methanol (6 x 50 mL) and hexane (4 x 50 mL) and dried under vacuum to afford  
187 the product as a magenta waxy solid (7.1 g, 52 %) which was used without further purification.

188 <sup>1</sup>H NMR (600 MHz, DMSO) δ (ppm): 11.26 (s, 2H, NH), 8.20 (s, 2H, ArH), 7.96 (s, 2H, ArH), 7.30 (s,  
189 2H, ArH). <sup>13</sup>C NMR (600 MHz, DMSO): 161.7, 136.2, 132.8, 131.3, 130.8, 128.8, 108.6. LRMS (EI+)  
190 m/z 300 [M]<sup>+</sup>.

191

192

193

194

195



196 **2,5-Bis(2-octyldodecyl)-3,6-di(thiophen-2-yl)-2,5-dihydropyrrolo[3,4-c]pyrrole-1,4-dione (10)**

197

198

199

200

201

202

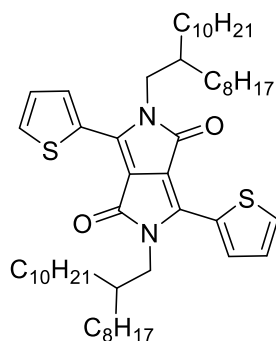

203 To a dry degassed flask under argon was added compound (9) (1.02 g, 3.4 mmol), 9-  
204 (bromomethyl)nonadecane (4.05 g, 11.2 mmol), potassium carbonate (1.55 g), 18-crown-6 (0.01  
205 g), followed by anhydrous DMF (40 mL). The resulting magenta solution was heated to 120 °C and  
206 allowed to stir overnight. The reaction was cooled to room temperature and then concentrated  
207 *in vacuo*. The crude product was then purified *via* column chromatography on silica gel  
208 (hexane:chloroform = 4:1) to afford the product as a magenta solid (0.63 g, 22%).

209 <sup>1</sup>H NMR (400 MHz CDCl<sub>3</sub>) δ (ppm): 8.87 (dd, *J* = 3.9, 1.0 Hz, 2H, ArH), 7.62 (dd, *J* = 5.0, 1.0, 2H Hz,  
210 ArH), 7.28 (m, 2H, ArH), 4.02 (d, *J* = 7.7, 4H, NCH<sub>2</sub>), 1.90 (brs, 2H, NCH<sub>2</sub>CH), 1.38-1.13 (m, 64H,  
211 CH<sub>2</sub>), 0.89-0.84 (m, 12H, CH<sub>3</sub>). <sup>13</sup>C NMR (151 MHz, CDCl<sub>3</sub>): δ 161.9, 140.6, 135.4, 130.6, 129.9,  
212 128.5, 108.0, 46.3, 37.8, 32.0, 31.9, 31.3, 30.1, 29.8, 29.6, 29.4, 26.3, 26.3, 22.8, 22.8, 14.3. LRMS  
213 (EI+) *m/z* 749 [M]<sup>+</sup>.

### 214 **1.1.3. TIPS-tetracene synthesis**

215 TIPS-tetracene was prepared as previously reported<sup>1</sup>, and was purified by recrystallizing three  
216 times from hexanes.

217

218

219 **1.2. Sample preparation**

220 The diphenylanthracene blend solution was prepared in a nitrogen-filled glovebox with  
221 anhydrous toluene, at a diphenylanthracene concentration of 30 mg/mL and a  
222 diphenylanthracene:Pt-porphyrin:polystyrene ratio of 50:1:15 (wt/wt). Solution was heated  
223 at 90°C for 1 day and then filtered with a PTFE filter (400  $\mu\text{m}$ ). Films were spin-coated from  
224 hot solution. Solutions of DPPT and INDB were prepared in air, at a concentration of 6.25  
225 mg/ml in toluene with an additional 25 mg/ml of polystyrene. To control for the effects of  
226 oxygen, DPPT solutions were also prepared in a nitrogen-filled glove-box with anhydrous  
227 toluene. TIPS-tetracene solutions were prepared in a nitrogen-filled glove-box with  
228 anhydrous toluene, at a concentration of 50 mg/ml. Thin films of all materials were spun on  
229 quartz-coated glass substrates for reference optical measurements.

230 To prepare microcavities, we first deposited a thick (150-200 nm) Ag mirror on quartz-coated  
231 glass substrates with a thermal evaporator. Films of the desired thickness ( $\sim 200$  nm, aiming  
232 for  $\lambda$ -mode microcavities) were spin-coated on top, within a glove-box in the case of oxygen-  
233 sensitive systems. We then evaporated the semitransparent top Ag mirror (25-30 nm) to  
234 complete the microcavities. Because of the high sensitivity of triplet-related dynamics to  
235 atmospheric oxygen<sup>2</sup>, all samples were encapsulated prior to removal from the glovebox, with  
236 the exception of select DPPT films and microcavities used to study the oxygen dependence of  
237 our observations. We used the following protocol. Within a nitrogen-filled glovebox, films or  
238 microcavities were covered with a glass microscope coverslip of larger dimension than the  
239 substrate, using strips of 100  $\mu\text{m}$ -thick carbon tape to prevent the surfaces from touching.  
240 We mixed a two-part fast-drying epoxy (Araldite) within the glovebox and applied this liberally  
241 around all four edges of the sample substrate, ensuring a complete seal with the coverslip.  
242 The samples were then allowed to dry for >18 hours prior to removal from the glovebox. Using  
243 this protocol, we find that samples retain their initial behaviour at least 1 year after  
244 fabrication, stored under ambient conditions.

245 Some reference samples were also prepared entirely within the thermal evaporator used for  
246 mirror deposition. These were prepared with either a 'thick' (73 nm) or 'thin' (20 nm) layer  
247 of TIPS-tetracene. For thick samples the organic layer consisted of a 20-nm layer of  
248 bathocuproine (BCP, Sigma Aldrich), the layer of TIPS-tetracene and a final 20-nm capping  
249 layer of BCP. BCP was evaporated at a rate of 0.3  $\text{\AA}/\text{s}$ , and TIPS-tetracene at a rate of 0.3  
250  $\text{\AA}/\text{s}$ . For the 'thin' samples the organic layer consisted of a 90-nm layer of BCP, a layer of  
251 TIPS-tetracene of 20 nm and a final 90 nm capping layer of BCP. BCP was evaporated at a  
252 rate of 1  $\text{\AA}/\text{s}$  for these samples, and TIPS-tetracene at a rate of 0.3  $\text{\AA}/\text{s}$ . Mirror deposition  
253 and encapsulation were performed identically to spin-cast samples.

254

255 **1.3. Steady-state measurements (absorption, PL, reflectivity)**

256 The absorption and photoluminescence spectra of reference films were acquired with a  
257 Fluoromax spectrofluorometer (Horiba Jobin Yvon) equipped with the F3031 transmission  
258 accessory. Together with the film thickness determined using a Dektak stylus profiler, these  
259 spectra were used to determine the optical parameters for transfer matrix modelling.  
260 Microcavity reflectivity maps were obtained on a home-built goniometer system, using  
261 motorised arms for excitation and collection that allow the angle of incidence to be swept  
262 from 10° to 60°. White light was provided by a fibre-coupled lamp with deuterium and  
263 halogen sources. Collected light was sent via fibre to an Andor Shamrock CCD spectrometer.  
264 Steady-state photoluminescence spectra were obtained with the time-resolved  
265 photoluminescence system (below), using sufficiently long gate windows to capture the full  
266 microcavity or film dynamics.

#### 267 **1.4. Time-resolved photoluminescence**

268 Time-resolved photoluminescence measurements were acquired with an Andor iStar ICCD,  
269 coupled to a Shamrock 303i spectrograph. Excitation was provided by an Nd:YAG Q-switched  
270 laser (Innolas Picolo) tuned for second-harmonic (532 nm) or third-harmonic (355 nm) output  
271 and synchronized with the ICCD. Nominal pulse duration is 600 ps, at a typical repetition rate  
272 of 5 kHz. Excitation and collection were through the same aspheric condenser lens ( $f=3.2$  mm,  
273  $NA=0.76$ ), with the excitation incident on the sample at 40°. Angle-dependent measurements  
274 were performed using an additional k-space lens to image the rear Fourier plane of the  
275 excitation/collection optic.

276 Two of the materials systems studied – DPA:PtOEP blends and DPPT – exhibit delayed  
277 fluorescence through bimolecular triplet-triplet annihilation. To be able to compare between  
278 thin-film and microcavity measurements, it is thus essential to correctly account for  
279 differences in excitation density caused by the mirrors of the microcavity. These  
280 considerations do not apply to TIPS-tetracene, where all of the relevant processes are  
281 geminate. For the bimolecular systems, we use simple optical considerations to determine  
282 the appropriate excitation scaling factor for microcavity vs film. We account for partial  
283 transmission through the semitransparent top mirror and multiple passes of the light through  
284 the film due to internal reflections, attenuated by the organic dye absorption. For example,  
285 in the DPA:PtOEP microcavities the 532 nm excitation is partially transmitted through the top  
286 mirror (~17%), and losses through this mirror on internal reflection constitute the main  
287 depletion channel of the pulse. Because of the weak absorption of the dilute porphyrin layer,  
288 internal reflections yield only 6.6% absorption of the incident light at 532 nm, compared with  
289 9.8% in the mirror-backed films measured for comparison. Therefore, in our comparison of  
290 film samples measured at 50  $\mu$ W incident laser power and microcavities measured at 150  $\mu$ W  
291 in Figure 2d in the main text, the microcavities have a higher excitation density (~2x). As  
292 shown in Fig S3b below, in these systems this typically results in a faster decay of delayed  
293 fluorescence. The kinetic enhancement we report in main-text Figure 2d is thus despite the  
294 higher intrinsic triplet depletion rate.

295           **1.5.       Transfer matrix simulations**

296   Microcavity reflectivity data was modelled using transfer matrix simulations as previously  
297   reported<sup>3</sup>, based on the measured absorption of the organic films. The absorption spectra  
298   were fitted to a series of Lorentzian peaks, with the oscillator strength of each individually  
299   tuned to correctly reproduce the extinction of the measured film. A uniform film of these  
300   absorbers was then modelled between two Ag mirrors (200 nm and 30 nm), using tabulated  
301   value for the Ag index of refraction. The optical properties of the entire system (transmission,  
302   absorption, reflectivity) were calculated as a function of angle for comparison to the  
303   measured reflectivity maps. For these purposes, the index of the refraction of the organic  
304   layer inside the microcavity was treated as a free parameter, and it was adjusted to provide  
305   the correct dispersion for uncoupled cavity modes observable at shorter and longer  
306   wavelengths than the exciton-polariton bands of interest. Good fits were obtained with  
307   typical values  $\sim 1.6$ . The oscillator strength of the organic film was also adjusted slightly  
308   compared to the bare-film reference, to allow for slight variation in dye concentration from  
309   batch to batch, spatial inhomogeneity (reflectivity measurements are taken over a  $\sim 0.5$  mm  
310   spot, versus 8 mm aperture for absorption) and inevitable partial sample degradation in air  
311   for reference film measurements (due to the need to subsequently measure film thickness).  
312   In all materials, an adequately parametrized model which closely describes the film  
313   absorption can also closely reproduce the measured reflectivity maps, confirming that all  
314   samples are within the strong exciton-photon coupling regime. In addition to the peak  
315   positions of the polariton branches which are output by the transfer matrix model, we also  
316   include the input exciton peak positions and cavity photon mode dispersions as dashed lines  
317   in the main-text figures and Figures S3 and S7 below.

318

## 319 2. Diphenylanthracene:Pt-porphyrin:polystyrene 50:1:15

320 Figure S1 shows the steady-state absorption and emission from the blend film. The vibronic  
321 progression of diphenylanthracene can be clearly distinguished, while the absorption 500-550  
322 nm of the porphyrin dopant is markedly weaker. At this low loading the porphyrin is too  
323 weakly absorbing to enter the strong-coupling regime itself. Following excitation at 355 nm  
324 (blue), we measure direct diphenylanthracene fluorescence 400-500 nm, as well as  
325 substantial Pt-porphyrin phosphorescence due to rapid energy transfer from  
326 diphenylanthracene and intersystem crossing<sup>4,5</sup>. Exciting Pt-PEOP results in up-converted  
327 emission at 400-450nm from diphenylanthracene. As this is a solid-state blend,  
328 phosphorescence at 650nm dominates the spectrum due to significant phase-separation,  
329 which prevents Pt-PEOP triplets from reaching the diphenylanthracene regions of the film<sup>4,5</sup>.

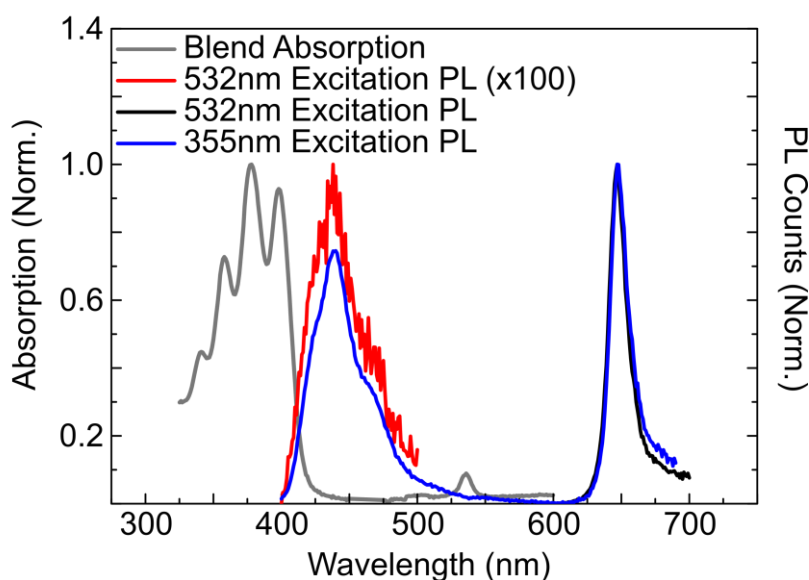

**Figure S1.** Steady-state characterisation of photon up-conversion blend. Absorption spectrum (grey) of blend film, and photoluminescence spectra following excitation at 350-355 nm (blue) and at 530 -535 nm (black). As indicated, the diphenylanthracene emission following excitation at 530-535 nm is scaled 100x (red).

330

331 In Figure S2 we show the delayed emission decay kinetics for the cavity at three excitation  
332 powers. As we increase the power, we see a reduction in the PL lifetime consistent with the  
333 well-known bimolecular process of triplet-triplet annihilation. As described in Section 1.4  
334 above, we account for this intensity dependence when we compare measurements taken  
335 with 50  $\mu$ W incident laser power for the film samples with 150  $\mu$ W for the microcavities in  
336 Figure 2d in the main text.

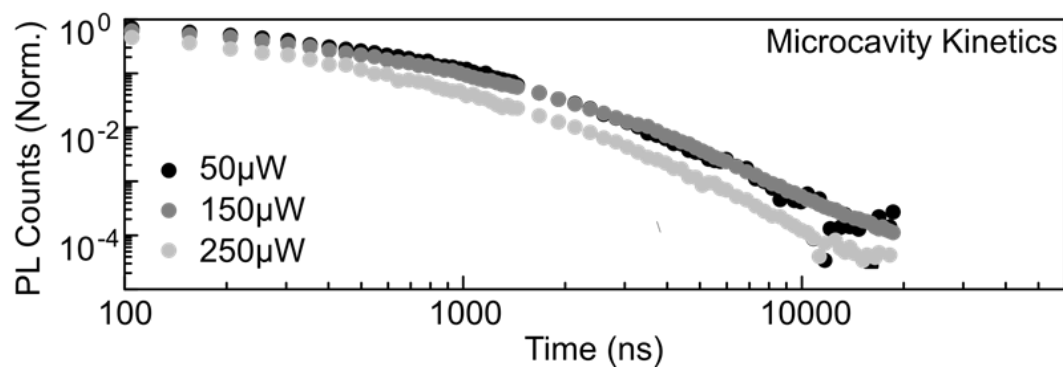

**Figure S2.** Excitation power dependence of diphenylanthracene:PtOEP blend microcavity emission, exhibiting faster decay at higher powers consistent with bimolecular triplet-triplet annihilation within diphenylanthracene domains.

337

338 **3. Indolonaphthyridine benzene (INDB) – Triplet-free reference**

339 To investigate the importance of triplet-triplet annihilation to our observed polaritonic  
340 enhancement, we performed similar studies on a dye which exhibits no observable delayed  
341 emission and shows no evidence of triplet formation: indolonaphthyridine benzene (INDB).  
342 Figure S3 shows a reflectivity map of a Ag-Ag microcavity containing an INDB blend film. The  
343 clear anti-crossing at the 0-0 absorption energy and transfer matrix modelling (lines)  
344 confirm that this microcavity is in the strong-coupling regime. Following photoexcitation of  
345 the microcavity, all emission is from the lower polariton branch.

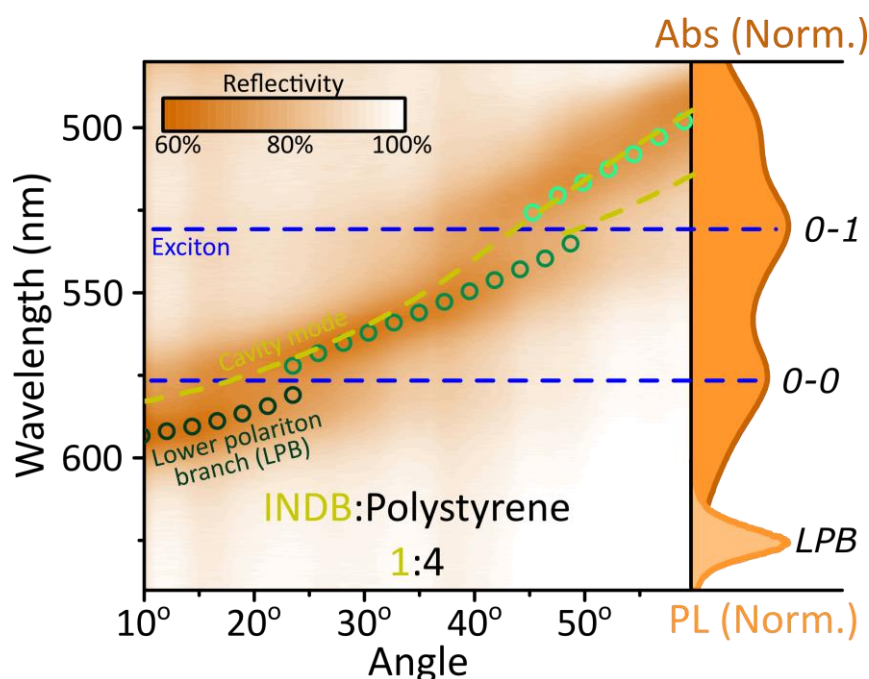

**Figure S3.** Reflectivity map of INDB microcavity. Ag-Ag microcavity containing INDB:polystyrene (1:4 by weight) film. Comparison with absorption spectrum (right) and transfer matrix modelling (lines, circles) confirms strong coupling. All emission arises from the lower polariton branch (LPB).

346

347

348 INDB film and microcavity emission dynamics are shown in Figure S4, integrated over the  
349 entire spectral range (i.e. both singlet and excimer bands in the film). In the thin film,  
350 beyond the instrument response region the emission is dominated by a red-shifted,  
351 featureless excimer band, as is typical for such planar molecules. Kinetics for the film and  
352 microcavity samples are similar, confirming the excimer can also populate the lower  
353 polariton branch. This effect has been previously reported in microcavities containing a  
354 BODIPY dye and described through a 'radiative pumping' mechanism<sup>6</sup>. Because the parent  
355 state in this process is by necessity already emissive, the microcavity has no substantial  
356 effect on the emission lifetime between cavity and film samples. There is no detectable  
357 enhancement in 'delayed' emission. These measurements confirm that the large changes in  
358 lifetime we report in the main text are not an artefact of our measurement conditions. In  
359 the absence of triplet-triplet annihilation, we observe no significant lifetime enhancement  
360 between film and microcavity.

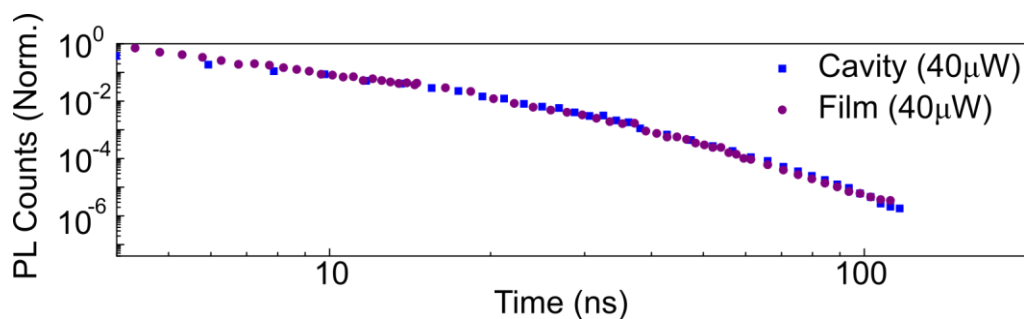

**Figure S4.** INDB emission kinetics. Emission kinetics integrated over full spectral bandwidth of bare film (circles) and microcavity (squares) of INDB.

361



362 **4. TIPS-tetracene**

363 Because the effects of strong coupling are most pronounced in this material, we performed  
 364 additional processing checks on TIPS-tetracene films to ensure our observations are not  
 365 related to materials handling. The full results are tabulated in Table S1, with detailed spectra  
 366 and kinetics in the following sections.

367 **Table S1.** Summary of sample types and observed behaviour.

| Prep. no. | Sample type                                                                               | Strong coupling? | Strong delayed PL? | Notes                                                                                                                                                                                             |
|-----------|-------------------------------------------------------------------------------------------|------------------|--------------------|---------------------------------------------------------------------------------------------------------------------------------------------------------------------------------------------------|
| 1         | Spin-cast thin film (~200 nm) on glass, toluene solution                                  | no               | no                 | reproduces literature behaviour                                                                                                                                                                   |
| 2         | Spin-cast thin film (~200 nm) on glass, chloroform solution                               | no               | no                 | change in morphology does not alter dominant PL dynamics                                                                                                                                          |
| 3         | Spin-cast thin film (~200 nm) on glass, toluene solution, thermally annealed              | no               | no                 | improves morphology and reduces disorder but only slightly enhances delayed emission                                                                                                              |
| 4         | Spin-cast thin film (~200 nm) on glass, toluene solution, exposed to ultrahigh vacuum     | no               | no                 | removes residual solvent and possible quenching sites, improves morphology but dynamic effects are within sample to sample fluctuation                                                            |
| 5         | Spin-cast thin film (~200 nm) on Ag, toluene solution                                     | no               | no                 | no effect, reproduces reference film within sample-to-sample variance. Ag proximity does not result in any enhancement                                                                            |
| 6         | Evaporated TIPS-tetracene film on glass                                                   | no               | no                 | reproduces spin-cast film behaviour                                                                                                                                                               |
| 7         | Evaporated BCP:TIPS-tetracene:BCP film (20 nm:73 nm:20 nm) on glass                       | no               | no                 | slight change in spectral shape due to increased disorder at TIPS-tetracene:BCP interface, but evaporation with BCP does not significantly alter photophysical properties                         |
| 8         | Evaporated BCP:TIPS-tetracene:BCP film (20 nm:73 nm:20 nm) on glass, capped with 25 nm Ag | no               | no                 | minor effect, similar to thermal annealing or ultrahigh vacuum treatment. Microcavity processing procedures are insufficient to cause enhanced delayed emission in the absence of strong coupling |
| 9         | Evaporated BCP:TIPS-tetracene:BCP film (90 nm:20 nm:90 nm) on glass                       | no               | no                 | no effect, photophysics of thin film are identical to thick films                                                                                                                                 |
| 10        | Evaporated BCP:TIPS-tetracene:BCP film (90 nm:20 nm:90 nm) on Ag, capped with 25 nm Ag    | no               | no                 | no effect, encapsulation within a non-coupled microcavity does not enhance the delayed emission                                                                                                   |
| 11        | Spin-cast thin film (variable thickness) on Ag, toluene solution, capped with 25 nm Ag    | yes              | yes                | polariton formation results in substantially enhanced delayed emission                                                                                                                            |
| 12        | Evaporated BCP:TIPS-tetracene:BCP film (20 nm:73 nm:20 nm) on Ag, capped with 25 nm Ag    | yes              | yes                | polariton formation results in substantially enhanced delayed emission, even when there is no physical contact between active layer and Ag                                                        |

368

#### 369 4.1. Solution-processed control samples

370 Spin-cast control films (2) were prepared from chloroform solutions as in the main text, to  
 371 determine if the slight changes in morphology that result<sup>7</sup> have any effect on the delayed  
 372 emission dynamics. Films types (3) and (4) were prepared identically to those in the main text,  
 373 and then subjected to thermal annealing or ultrahigh vacuum in the evaporation chamber.  
 374 These measurements allowed control for whether any incidental effects of microcavity  
 375 preparation (e.g. changes in morphology under vacuum) could be the origin of the enhanced  
 376 delayed emission reported in the main text. Other control samples were prepared using the  
 377 same solution processing protocol on Ag mirrors (5). All samples were encapsulated and  
 378 measured following the same procedures used for all other samples. We observe no  
 379 systematic change in the photoluminescence decay kinetics following these solution-based  
 380 processing steps, as summarised in Figure S5. Even for films with no additional treatments,  
 381 we observe slight variation in the PL lifetime (panel a). Similar variation can be obtained by  
 382 scanning across the same film, and can be attributed to slight changes in the crystallinity,  
 383 resulting in a better-defined and more uniform cut-off for the initial  $S_1$ -<sup>1</sup>TT equilibrium.  
 384 Following annealing, vacuum treatment or deposition on a mirror we observe variation on a  
 385 similar scale (panel b), in some cases with increased prominence of the ‘kink’ as the kinetics  
 386 transition from cleanly exponential behaviour to a less-defined power-law-type decay weakly  
 387 detectable above the noise floor. In no instance do we detect changes in the film behaviour  
 388 commensurate with the effects of microcavity formation, confirming that the effects we  
 389 report in the main text do not arise from our processing or metal-organic interactions, but are  
 390 instead uniquely caused by strong light-matter coupling.

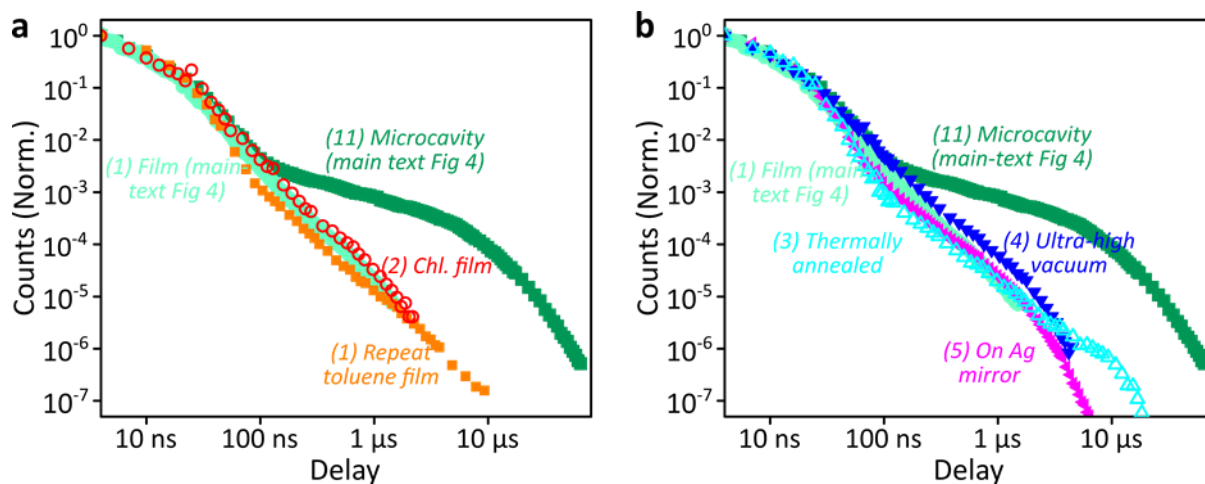

391 **Figure S5.** Control measurements on TIPS-tetracene films. **a** Films prepared from different batches of  
 392 solution or different solvent at the same TIPS-tetracene exhibit the same qualitative behaviour. The  
 393 slight spread of lifetimes indicates slight variations in film crystallinity; similar variation can be  
 394 obtained scanning within the same film. **b** Exposure of the films to heat or ultra-high vacuum does not  
 395 significantly change the kinetics beyond the standard film-to-film variability. Similarly, deposition on  
 396 an Ag mirror does not result in a major change in lifetime due to metal-organic interactions. No  
 397 processing steps result in an enhancement that can explain the behaviour observed in full  
 398 microcavities. In each kinetic only every third data point is shown for clarity.

## 400 4.2. Fully evaporated control samples

401 We additionally prepared fully evaporated sample structures in which the TIPS-tetracene  
402 active layer is surrounded by two 20-nm spacer layers of BCP, to ensure that direct physical  
403 contact between TIPS-tetracene and Ag is not responsible for the observed delayed  
404 emission. Samples in this section are described with reference to the preparation number in  
405 Table S1. We first confirmed that evaporation of TIPS-tetracene does not yield films with  
406 significantly different emission properties (Figures S6, S8a). Multilayer BCP:TIPS-  
407 tetracene:BCP films (7) and (9) on glass exhibit a redshift of the overall PL spectral weight,  
408 consistent with a minor contribution from excimer-type sites previously reported to exist in  
409 disordered samples<sup>8</sup>. These features do not dominate the emission and are presumably a  
410 minority species in the film, and we expect they are formed at the TIPS-tetracene:BCP  
411 interface where disorder will be greater. There is no accompanying change in the PL decay  
412 dynamics: evaporated and spin-coated samples are fully equivalent. Likewise, subsequent  
413 coating (8) with an evaporated Ag mirror does not significantly enhance the delayed  
414 emission and results in changes comparable with film-to-film variation.

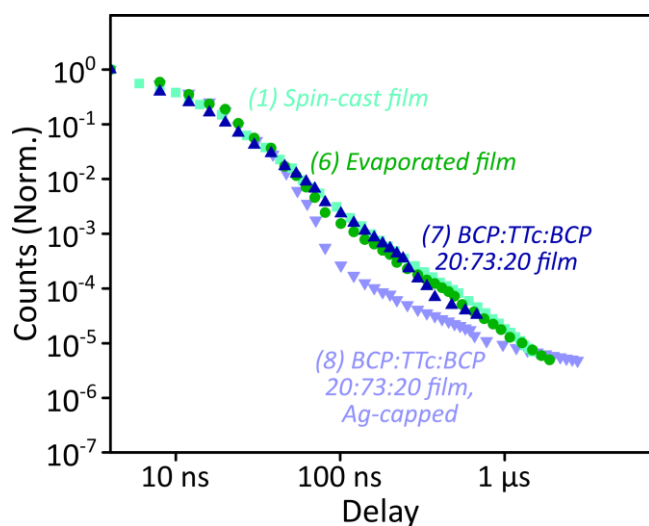

415  
416 **Figure S6.** Evaporation of TIPS-tetracene results in the same photoluminescence dynamics, whether  
417 in a pure film or a multilayer structure with BCP. Subsequent evaporation of a Ag capping layer does  
418 not substantially alter the delayed emission, with similar effects to thermal annealing or vacuum  
419 treatment (see above), and it offers no enhancement.

420 Sample (10) is a full microcavity structure, with a sufficiently thin layer of TIPS-tetracene and  
421 a sufficiently large negative detuning that no strong light-matter coupling is possible. This  
422 sample exhibits effectively identical dynamics to other reference films, demonstrating that  
423 the full microcavity processing steps are insufficient to induce major enhancement to the  
424 delayed emission if polariton formation is not possible. However, when we prepare full  
425 microcavities with a thick evaporated layer of TIPS-tetracene (12) we observe clear strong  
426 light-matter coupling in the angle-dependent reflectivity (Figure S7), well-defined polariton  
427 emission (Figure S8a) and the same substantial enhancement to delayed emission (Figure  
428 S8b) reported in the main text for spin-cast microcavities (11). The enhancement is clearly

429 independent of physical contact between the TIPS-tetracene and metal mirrors or any of the  
430 sample processing steps, and it is thus a unique consequence of polariton formation.

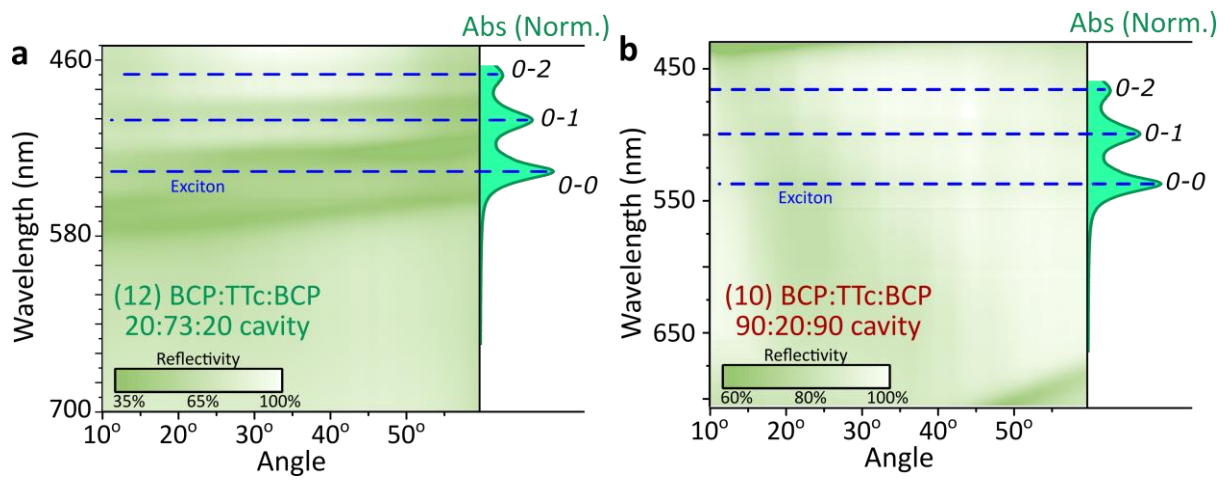

431

432 **Figure S7.** Fully evaporated TIPS-tetracene samples. **a** Angle-dependent reflectivity of the 'thick'  
433 TIPS-tetracene evaporated cavity shows strong coupling as in solution-processed cavities. **b** No  
434 strong coupling is evident in the 'thin' TIPS-tetracene evaporated cavity.

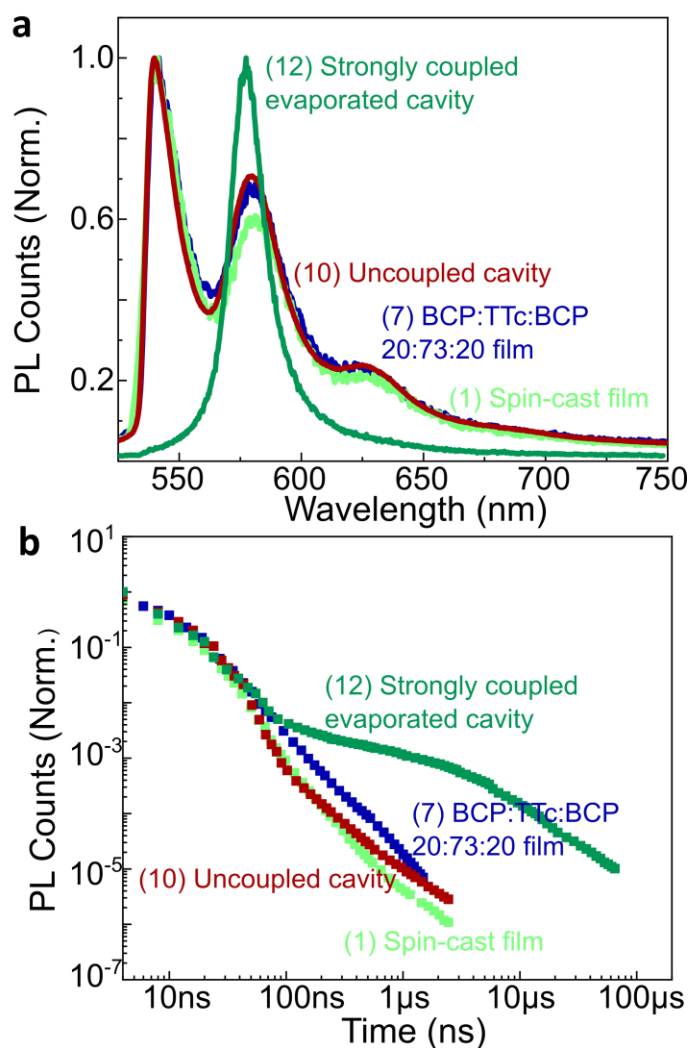

435

436 **Figure S8.** Characterisation of fully evaporated samples. **a** Emission spectra and **b** integrated kinetics  
 437 of each sample. Data is acquired and processed as in main-text Figure 3. Comparison of samples  
 438 produced by evaporation and spin casting shows little variance. A strongly detuned microcavity with  
 439 low oscillator strength ('Uncoupled cavity') also exhibits no enhancement in the delayed emission.

440

### 441 **4.3. Detuning dependence**

442 We have also measured the dependence of the observed enhancement on the energy offset  
 443 between cavity mode and  $S_1$  (the 'detuning'). Figure S9 shows that across the entire  
 444 detuning series we observe the same qualitative effect, though the magnitude and lifetime  
 445 of the enhancement appears to vary. There is no systematic dependence on energy offset.  
 446 Interestingly, the least and most negatively detuned cavities (-71 and -545 meV) exhibit  
 447 nearly the same long-time kinetic. The extremes of dynamic behaviour are instead obtained  
 448 with two similar 'intermediate' negative detunings, -342 and -418 meV. The fairly short  
 449 energy scale for such changes in behaviour is consistent with earlier studies of squaraine  
 450 microcavities<sup>9</sup>, where the detuning scans the LPB over relatively sharp energetic resonances

451 within the exciton reservoir. The complex structure observed here suggests the presence of  
 452 multiple resonances, likely related to the more complex vibronic structure of TIPS-tetracene.

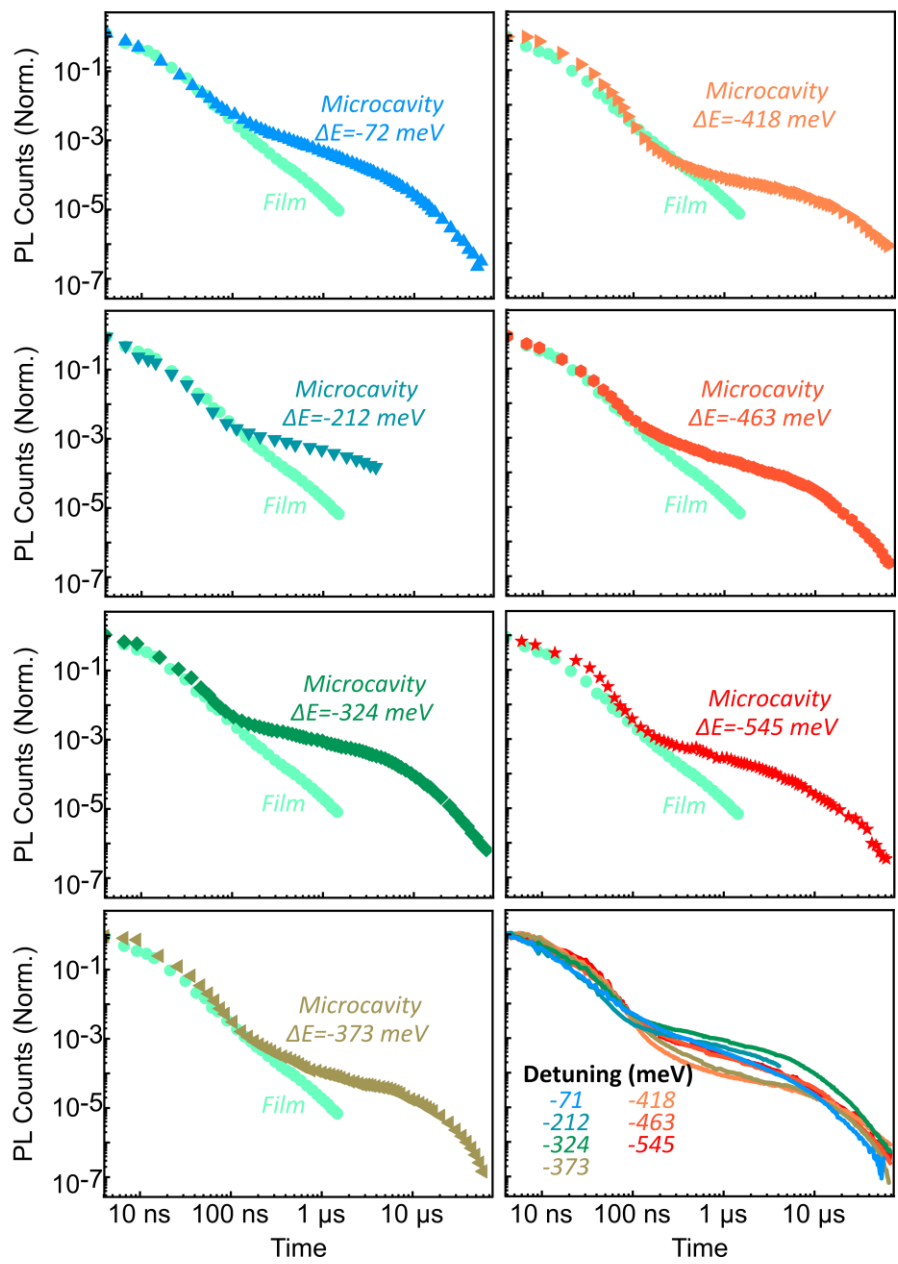

453  
 454 **Figure S9.** Detuning dependence in TIPS-tetracene microcavities. Integrated PL kinetics, acquired and  
 455 processed as in main-text Figure 3. The same qualitative behaviour is observed over the full range,  
 456 but there is no systematic dependence of the relative magnitude or lifetime of the enhanced  
 457 emission. In each kinetic only every fifth data point is shown for clarity.

458 In the detuning-dependent kinetics above, the microcavity emission was collected with the  
 459 same NA=0.76 lens used for other measurements and thus effectively integrated across the  
 460 entire LPB. The spectral shape revealed that emission was predominantly from near the  
 461 bottom of the branch, at 0°. In addition, we measured the angular dispersion of steady-state  
 462 emission for selected cavities using a goniometer system able to measure up to 70°. We

463 corrected these dispersions for the photon fraction along the LPB to determine the  
 464 polariton population distributions as a function of detuning, presented in Figure S10. We  
 465 make two primary observations. 1) The population for every detuning is predominantly  
 466 located at the bottom of the LPB, suggesting the pathway to reach the branch bottom must  
 467 not depend strongly on energy offset. Given the short lifetime ( $\ll 100$  fs) of individual  
 468 polaritons within our low-Q (30-60) cavities, it is very unlikely these states are populated  
 469 through polariton-polariton scattering or vibrational relaxation along the LPB. Instead, as is  
 470 typical for such organic microcavities dominated by reservoir dynamics<sup>6,10</sup>, the distribution  
 471 of polariton population relates directly to the distribution of parent states, taking into  
 472 account that the pathway from reservoir to LPB may release energy. In light of restrictions  
 473 on the energy of the parent  $^{1/5}TT$  states in the reservoir (the TT states are expected to be  
 474 very close in energy to  $S_1$ , not deeply stabilised), this result is surprising. It points to a wide,  
 475 effectively continuous distribution of parent reservoir states, of accepting LPB states (for  
 476 instance, higher vibronic polaritons that emit at the same energy as the LPB<sup>11,12</sup>) and/or of  
 477 vibrational scattering channels enabling resonant transfer to the LPB bottom. 2) The cavities  
 478 show slight enhancement in the populations at energies  $\sim 1.9$  eV and  $\sim 2.1$  eV, regardless of  
 479 the angle at which this energy occurs. This distinctive resonance effect would be  
 480 approximately consistent with radiative pumping from  $^{1/5}TT$ , if these peaks are taken to be  
 481 the 0-1 and 0-2 vibronic replicas (0-0 origin  $\sim 2.25$  eV). Alternatively, it could be consistent  
 482 with a model in which vibronic polariton branches above the LPB<sup>11,12</sup> are brought into  
 483 resonance with the  $^{1/5}TT$  reservoir, resulting in more efficient transfer.

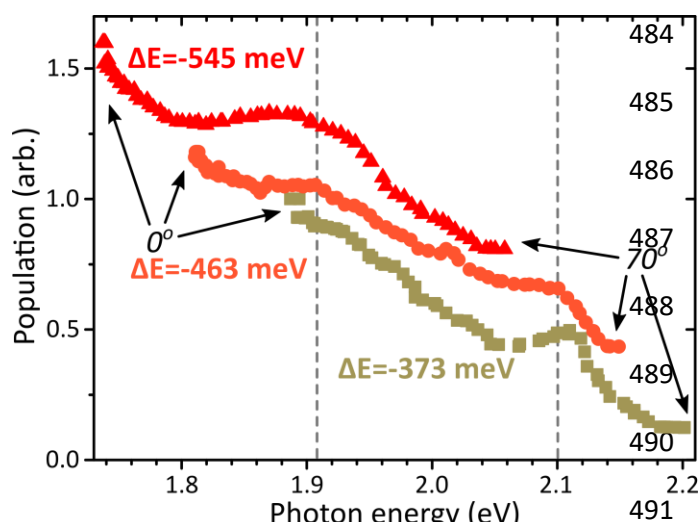

**Figure S10.** LPB population distribution. Angle-dependent emission from three negatively-detuned TIPS-tetracene microcavities, corrected for photon fraction to yield population. Distinct enhancement is detected whenever the LPB crosses  $\sim 1.9$  eV and  $\sim 2.1$  eV (dashed lines). The 0-0 exciton peak which forms the polaritons is located at  $\sim 2.3$  eV. Regardless of the resonant enhancement, the polariton population is predominantly located at or near the bottom of the LPB for every detuning. Plots are vertically offset for clarity.

492 **4.4. Spectral/k-space evolution**

493 Both in films and microcavities of TIPS-tetracene, we observe that the spectral shape does  
494 not change over the entire decay range. We show this in Figure S11 with spectra taken within  
495 the instrument response and at very long time delay. We observed similar behaviour for  
496 microcavities of all materials (including in time-resolved k-space measurements), and films of  
497 the photon up-conversion blend. In all instances, this demonstrates that the emission process  
498 is mediated by the same state throughout the decay lifetime. In TIPS-tetracene films, this is  
499 the  $S_1$  state (whether directly photogenerated or regenerated from triplet-triplet  
500 annihilation). In microcavities, the emission is always from the lower polariton branch.

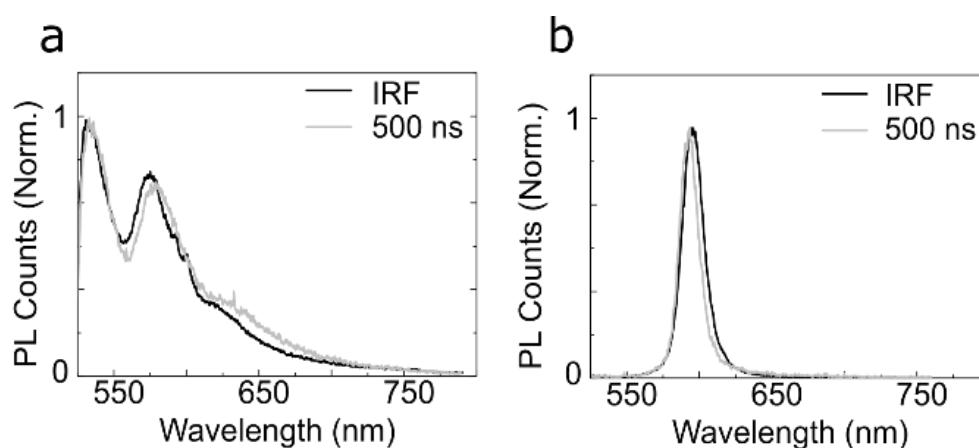

**Figure S11.** Time-resolved TIPS-tetracene emission. **a** Spectra of pure TIPS-tetracene film following excitation at 532 nm, collected within the instrument response (IRF) and at 500-600 ns after excitation. **b** Equivalent spectra for microcavity.

501

502



## 503 5. Rate modeling

504 To understand the mechanism of ultra-long-lived polariton emission, we have constructed a  
505 basic toy rate model for the TIPS-tetracene data. In principle this model could be extended  
506 to cover triplet-triplet annihilation in the other systems in the main text, but as this would  
507 involve dealing with exciton migration in a disordered and complex density of states, it is  
508 beyond the current scope of the work. The model, shown in Figure S12, is based on the  
509 current photophysical model of polycrystalline films of TIPS-tetracene presented in Weiss et  
510 al.<sup>13</sup> and Stern et al.<sup>8</sup> In this model singlet fission from  $S_1$  ( $k_{SF}$ ) creates a population of spin-  
511 entangled triplet-pairs  $^1(TT)$ , given by:

$$512 \quad |^1TT\rangle = 3^{-1/2}(|xx\rangle + |yy\rangle + |zz\rangle) \quad (1)$$

513 where  $|xx\rangle$ ,  $|yy\rangle$  and  $|zz\rangle$  are the zero-field triplet-pair basis states.  $^1(TT)$  is not an  
514 eigenstate of the spin-Hamiltonian in the regime of weak exchange coupling. In our model  
515 we term  $^1(TT)$  ' $TT_{\text{bright}}$ ' as this population is in equilibrium with  $S_1$  through  $k_{SF}$  and is  
516 observed through delayed emission from  $S_1$ . Over  $\sim 10$ ns, the  $^1(TT)$  states lose their spin-  
517 entanglement, and probably some  $S_1$  character, and evolve into dark triplet pair states,  
518 ' $TT_{\text{dark}}$ '. As there have been no spin-flips, the triplet pairs are still made up of  $|xx\rangle$ ,  $|yy\rangle$  and  
519  $|zz\rangle$ , and are initially weakly exchange coupled with mixed singlet ( $|^1TT\rangle = 3^{-1/2}(|xx\rangle +$   
520  $|yy\rangle + |zz\rangle)$ ) and quintet ( $|^5TT_a\rangle = 2^{-1/2}(|xx\rangle - |yy\rangle)$  or  $|^5TT_b\rangle = 6^{-1/2}(|xx\rangle + |yy\rangle -$   
521  $2|zz\rangle)$ ) character. In the weakly exchanged-coupled regime the individual triplets that make  
522 up the pair have only weak wavefunction overlap.

523 These weakly-coupled TT states are thought to co-exist with a population of strongly  
524 exchange coupled triplet-pairs<sup>13</sup>. With strong exchange coupling, the triplet-pair states are  
525 pure singlet ( $S=0$ ) or quintet ( $S=2$ ) states as  $S$  becomes a good quantum number in the  
526 strong-exchange coupling regime. The latter have been observed in TIPS-tetracene films  
527 using transient EPR<sup>13</sup>. The evolution between the initially created weakly exchange-coupled  
528 and the observable strongly exchange-coupled triplet-pair states most likely occurs via  
529 dynamic off-diagonal disorder<sup>13</sup>: thermal fluctuations that alter the relative spacing  
530 between molecules and thus the wavefunction overlap between them. This has been  
531 described in similar systems by Troisi *et al.*<sup>14</sup>

532 If these fluctuations are responsible for generating strongly exchange-coupled triplet pairs,  
533 we can assume an equilibrium exists between weakly and strongly exchange-coupled TT  
534 states. Therefore, the dark triplet-pair population  $TT_{\text{dark}}$  (taken to be the equilibrium  
535 combination of weakly- and strongly-coupled singlet/quintet TT states) should follow the  
536 observed EPR quintet dynamics. We note that EPR lifetimes do not necessarily represent the  
537 natural lifetimes of the system, which is perturbed by the EPR measurement itself. The  
538 natural ' $TT_{\text{dark}}$ ' lifetime could be longer than the EPR-measured quintet lifetime.

539 Nevertheless, we take the EPR-measured quintet lifetime as a reasonable estimate of the  
540  $TT_{\text{dark}}$  lifetime.

541  $TT_{\text{dark}}$  represents the equilibrium population of weakly exchange-coupled TT states with  
542 mixed singlet/quintet character and strongly exchange-coupled pure quintet states.  
543 Eventually spin-flips can occur, probably through spin-orbit coupling, effectively scrambling  
544 the spins within the triplet-pairs. At this point the zero-field basis states include  
545 combinations such as  $|xy\rangle$ ,  $|xz\rangle$ , etc. In this form, instead of all states (in the weakly  
546 exchange-coupled regime) showing some singlet character (i.e. containing  $|xx\rangle$ ,  $|yy\rangle$  or  
547  $|zz\rangle$ ), only 3/9 now have any singlet character. In this regime the triplets, although possibly  
548 still spatially bound in TIPS-tetracene as suggested by transient absorption measurements<sup>8</sup>,  
549 are no longer correlated ( $T_1+T_1'$ ). There is no signature of quintet pairs in transient EPR at  
550 this point, but their excited-state absorption can still be measured using transient  
551 absorption spectroscopy<sup>8</sup> and transient EPR spectra<sup>13</sup> show evidence of weakly exchange-  
552 coupled triplets. It is likely that some of the triplet pairs have fully dissociated on this  
553 timescale, forming spatially separated uncorrelated triplets, but we assume this is a  
554 negligible process in TIPS-tetracene.

555 In TIPS-tetracene-based microcavities we assume that the lower polariton branch dynamics  
556 are governed by the exciton reservoir photophysics. Therefore, we use photophysical data  
557 from the literature to parameterise our model. The rate constants from our model are  
558 shown in Table S2 and comparison of our model to literature data is shown in Figure S12b.  
559 Our basic model – in the absence of strong light-matter coupling – fits all three observables:  
560 delayed fluorescence, transient absorption (TA) and transient EPR. We have attempted to  
561 constrain the model by using the fewest free parameters per population, fixing the  
562 radiative, singlet fission and fusion rates from literature values and the intrinsic non-  
563 radiative rates for  $S_1$  and  $TT_{\text{bright}}$  from estimates based on the gap-law of non-radiative  
564 decay. The gap-law has been shown to be a good predictor of non-radiative rates for acene  
565 and hetero-acene-type materials<sup>15</sup>. The free parameters are:  $k_{\text{dark}}$ , which is fixed by fitting to  
566 the  $S_1$  delayed emission;  $k_{\text{nr}}$  and  $k_{\text{spin}}$  of  $TT_{\text{dark}}$ , fixed by fitting to the tr-EPR and TA data; and  
567  $k_{\text{nr}}$  of  $T_1+T_1'$ , fixed by fitting to the terminal decay in the transient absorption data. Only  $k_{\text{nr}}$   
568 and  $k_{\text{spin}}$  of  $TT_{\text{dark}}$  are not independently varying parameters. These are difficult to decouple  
569 as not enough is known about the intrinsic non-radiative decay of unentangled triplet-pairs  
570 or the time-constant for the formation of uncorrelated triplet pairs.

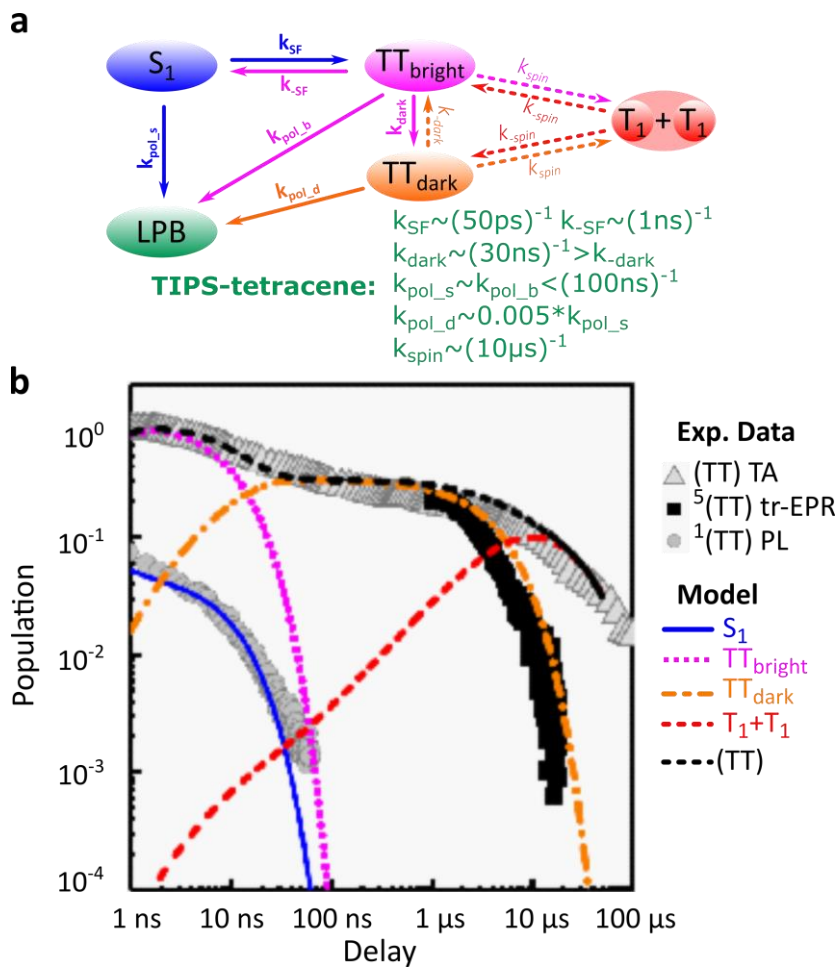

571

572 **Figure S12.** Basic rate model used to model TIPS-Tetracene film and microcavity emission. **a** schematic  
 573 of rate model, all rates are reproduced in Table S2. Parameters are set from literature or fit to  
 574 literature data<sup>8,13,16</sup>. **b** Comparison of our basic rate model with published optical (TA and PL)<sup>8</sup> and  
 575 spin-resonance spectroscopy<sup>13</sup>. Grey circles indicate delayed emission from  $S_1$ , which tracks our  $S_1$   
 576 population (blue line) and  $TT_{\text{bright}}$  population (pink dotted line) as  $S_1$  and  $TT_{\text{bright}}$  are in equilibrium. Black  
 577 squares indicate observed quintet dynamics from EPR. We fit our  $TT_{\text{dark}}$  population to match this decay  
 578 (orange dot-dashed line). Grey triangles show transient absorption of triplet-pair states which is  
 579 proportional to the sum of all triplet-pair populations. In our model  $(TT) = TT_{\text{bright}} + TT_{\text{dark}} + T_1+T_1$ , given  
 580 by the black dashed line. We fit the  $T_1+T_1$  lifetime to the decay of the transient absorption signal.

581 **Table S2.** Rates used in the rate model described in Figure S12 with results shown in Figures S13-15.

| RATE CONSTANT                          | VALUE            | REFERENCE OR RATIONALE                                                                                                                                                                                  |
|----------------------------------------|------------------|---------------------------------------------------------------------------------------------------------------------------------------------------------------------------------------------------------|
| <b>G</b>                               | 1/(0.5ns)        | Generation estimated from instrument response.                                                                                                                                                          |
| <b>LPB <math>K_R</math></b>            | 1/(0.1ns)        | Should be roughly equal to the photon lifetime (here we make it longer to speed up computation time, noting that it is markedly faster than other rates on our measurement timescales).                 |
| <b><math>S_1 K_R</math></b>            | 1/(15ns)         | Singlet radiative lifetime in solution <sup>17</sup>                                                                                                                                                    |
| <b><math>S_1 K_{NR}</math></b>         | 1/(30ns)         | Assuming the non-radiative decay is dominated by the gap-law, as for other acenes, with $E_{S1} = 2.3$ eV <sup>15</sup>                                                                                 |
| <b><math>TT_{BRIGHT} K_R</math></b>    | 1/40 x $S_1 k_r$ | Relationship previously determined for a similar heteroacene <sup>18</sup>                                                                                                                              |
| <b><math>TT_{BRIGHT} K_{NR}</math></b> | 1/15             | Assuming <sup>1</sup> (TT) decays via the same non-radiative gap-law as $S_1$ , as demonstrated by the authors in an up-coming review. Energy = $2 \times T_1 = 2.2$ .eV.                               |
| <b><math>TT_{DARK} K_{NR}</math></b>   | 1/5000           | Fit to the published <sup>5</sup> (TT) data <sup>13</sup> . Note this constant is not unique but is correlated with $k_{spin}$ below.                                                                   |
| <b><math>TT_{UNCORR} K_{NR}</math></b> | 1/30,000         | Fit to the transient absorption data <sup>8</sup> .                                                                                                                                                     |
| <b><math>K_{SF}</math></b>             | 1/0.05           | 50ps <sup>8</sup>                                                                                                                                                                                       |
| <b><math>K_{-SF}</math></b>            | 1/1              | Taken from a previous determination for tetracene <sup>16</sup>                                                                                                                                         |
| <b><math>K_{POL\_S}</math></b>         | 1/100            | Fit to data (this is a maximum rate, any faster and the LPB emission would decay faster than we observe. Smaller values are possible but do not change the dynamics, only the relative LPB population). |
| <b><math>K_{POL\_B}</math></b>         | 1/100            | Fit to data (as above)                                                                                                                                                                                  |
| <b><math>K_{POL\_D}</math></b>         | $x * K_{pol\_s}$ | Fit to data (see Figure S14). For data in the main text $x = 0.005$ .                                                                                                                                   |
| <b><math>K_{DARK}</math></b>           | 1/30             | Fit to delayed emission <sup>8</sup>                                                                                                                                                                    |
| <b><math>K_{-DARK}</math></b>          | 0                | In simplest model. Otherwise we used a distribution of rates to model the non-exponential tail of $S_1$ emission, see Figure S13.                                                                       |
| <b><math>K_{SPIN}</math></b>           | 1/10,000         | Fit to <sup>5</sup> (TT) EPR data <sup>13</sup> (see note for $K_{NR} TT_{dark}$ above).                                                                                                                |

582

583 Having parameterised the model using reference data, we modelled our own data. Using all  
 584 the same parameters as those fit to reference data in Figure S12, we first modelled our  
 585 delayed fluorescence, Figure S13. The basic model (solid black line ' $S_1$ ') reproduces the initial  
 586 exponential decay, as expected, but does not reproduce the power-law-like tail. To account  
 587 for this tail, we adapted the model to assume a distribution of  $k_{-dark}$  from  $(30ns)^{-1}$  to smaller  
 588 rate values. Using this distribution (dashed black line ' $S_1$ '), we can model our delayed  
 589 emission. We note that including this distribution does not significantly alter the full (TT)  
 590 population (Figure S12). All the control thin films measured show similar dynamics.

591

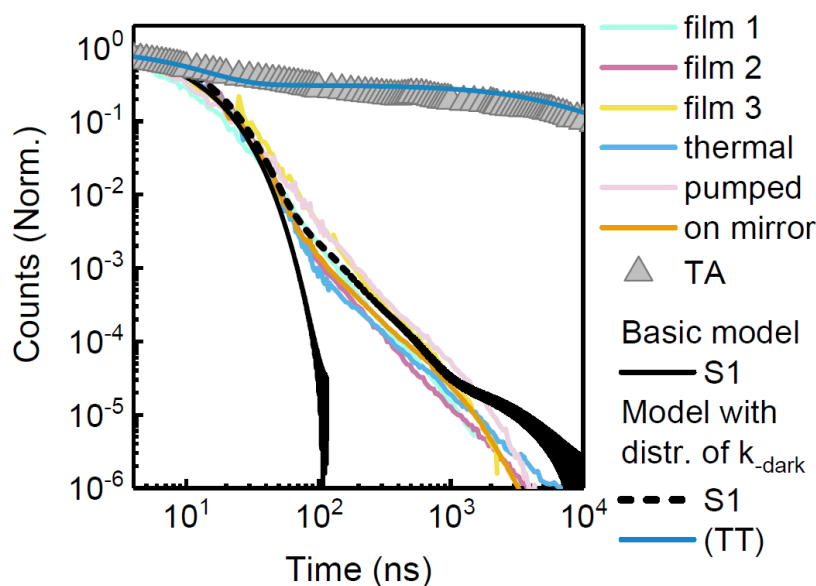

592

593 **Figure S13.** Model in Figure S12 applied to our data, which extends over many more orders of magnitude  
 594 compared with the published PL data<sup>8</sup>. The delayed emission has been measured on  
 595 numerous films, including those which are thermally annealed ('thermal'), have been pumped down  
 596 under ultrahigh vacuum ('pumped') and have been deposited on a mirror ('on mirror'). With the basic  
 597 model above we reproduce the exponential part of the  $S_1$  delayed emission, but not the tail (black  
 598 solid line). To reproduce the tail we used a distribution of  $k_{\text{dark}}$  rates from  $(30\text{ns})^{-1}$  to smaller values.  
 599 This is reasonable as  $TT_{\text{dark}}$  is made up of mixed singlet and quintet states and pure quintet states. The  
 600 same process that can generate the pure quintet states can also produce pure singlet  ${}^1TT$ , i.e.  $TT_{\text{bright}}$ ,  
 601 which should contribute to delayed  $S_1$  emission. The distribution of rates could be due to the  
 602 fluctuating nature of this population which moves from weak to strong coupling as the molecules  
 603 vibrate relative to each other at room temperature. It could also be due to other effects such as the  
 604 disordered nature of the sample.

605 Fitting to these complementary measurements over many orders of magnitude in time  
 606 strongly constrains the few free parameters of our kinetic model. One of the central results  
 607 of the model is that beyond  $\sim 70$  ns the bulk of the excited-state population resides in the  
 608  $TT_{\text{dark}}$  state, and this state is dominant until the  $\sim 10$   $\mu\text{s}$  timescale. To describe our  
 609 observations in the strong coupling regime, we assume that the essential photophysics of  
 610 TIPS-tetracene are unperturbed in the exciton reservoir and use the same rate constants as  
 611 for the film. Instead, we introduce the new emissive polariton state LPB. The low Q-factors  
 612 of our cavities (30-60) give an extremely short intrinsic polariton lifetime, meaning that all  
 613 dynamics will be governed by the exciton reservoir and transfer from it to the LPB,  
 614 parameterised here as  $k_{\text{pol}_x}$  from each state. We stress that this phenomenological rate  
 615 incorporates all processes that might contribute to the population transfer, including intra-  
 616 reservoir effects such as exciton migration. For simplicity, we also assume in our model that  
 617 the intrinsic decay of TIPS-tetracene results in quantitative population of the LPB and  
 618 radiative emission.

619 From the fits in Figure S14, we find that the additional depletion of  $S_1$  and  $TT_{\text{bright}}$  by the  
 620 polariton ( $k_{\text{pol}_s}$  and  $k_{\text{pol}_b}$ ) must be smaller than  $\sim(100\text{ns})^{-1}$  in order for the pre-100ns decay  
 621 not to be changed from the thin film reference. A faster (larger) rate would result in a  
 622 significant shortening of the LPB emission lifetime compared with the bare film  $S_1$  emission,  
 623 which we do not observe. To fit the correct relative intensity of the microcavity-enhanced  
 624 portion of the delayed emission we used  $k_{\text{pol}_d} = 0.005 k_{\text{pol}_s}$ . Using the same model but  
 625 varying the ratio of  $k_{\text{pol}_s}/k_{\text{pol}_d}$ , we were able to fit microcavity emission with different  
 626 detunings (Figure S14b).

627 This good fit of the model to our data and that of the literature suggests that the LPB  
 628 emission beyond 100ns originates primarily from  $TT_{\text{dark}}$ , the equilibrium population of  
 629 weakly exchange coupled singlet/quintet states and strongly exchange coupled pure quintet  
 630 states. These states do not significantly contribute to emission in the pure film but are able  
 631 to populate the LPB. We suggest the reason for this is the enhanced photonic mixing within  
 632  $TT_{\text{dark}}$ . Our model does not reproduce the tail of the LPB emission. At this point the triplet  
 633 pairs are uncorrelated (but possibly still spatially bound through some polaronic effect<sup>8</sup>).  
 634 The fraction of possible triplet pairs that could undergo enhanced photonic mixing (i.e.  
 635 those which contain basis states  $|xx\rangle$ ,  $|yy\rangle$  or  $|zz\rangle$  and hence some singlet character) has  
 636 been reduced from 1 to 1/3.

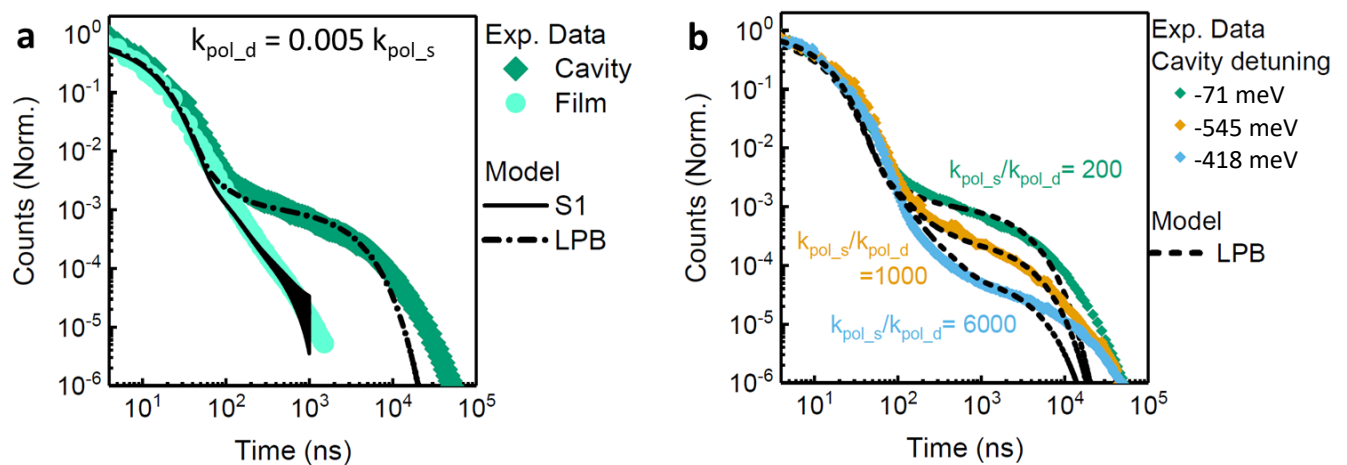

637

638 **Figure S14.** **a** Comparison between film and microcavity emission dynamics with the basic model in  
 639 Figure S12a (rates in Table S2) including a distribution of  $k_{\text{dark}}$  rates. The microcavity emission data is  
 640 assumed to follow the LPB population.  $k_{\text{pol}_s}$  was set to  $(100\text{ns})^{-1}$  and  $k_{\text{pol}_d}$  was fit to  $(20\mu\text{s})^{-1}$  **b** Data  
 641 from differently detuned cavities showing that the model reproduces the detuning by changing the  
 642 relative rate of LPB population from  $S_1$  and  $TT_{\text{dark}}$  ( $k_{\text{pol}_s}$  and  $k_{\text{pol}_d}$  respectively). The reason why  
 643 detuning affects the relative rate of LPB population from  $TT_{\text{dark}}$  is not yet clear. The model does not  
 644 match the very long-lived tail of emission ( $>10\mu\text{s}$ ). At such long times, it is likely that either  $T_1+T_1$  or  
 645 free triplets populate the LPB via triplet-triplet annihilation. This has not been considered here.

646 We note that our model suggests an additional potential pathway of polariton population  
 647 from  $TT_{\text{dark}}$ : indirectly, through an enhancement of  $k_{\text{dark}}$  and consequent (polariton-  
 648 enhanced) reformation of  $S_1$ . This would be an extremely surprising result, as it would suggest

649 that the intrinsic spin physics of uncoupled TIPS-tetracene states in the exciton reservoir are  
 650 changed by light-matter coupling, but it must be considered. To probe this possibility, we  
 651 performed the 'basic' model (without any distributions of rates) on the 'direct' and 'indirect'  
 652 channels. For this we assumed no distribution of  $k_{\text{-dark}}$  (and therefore a poor fit to the film  $S_1$   
 653 emission tail). In Figure S15a we show results for direct population of the LPB from  $TT_{\text{dark}}$  with,  
 654 as above,  $k_{\text{pol}_d} = (20\mu\text{s})^{-1}$ . In Figure S15b we show the best fit results for indirect population  
 655 via  $TT_{\text{bright}}$  (assuming a microcavity-induced enhancement of  $k_{\text{-dark}}$  from 0 to  $(1000\text{ns})^{-1}$ ). Either  
 656 mechanism would be interesting, but the better fit in Figures S15a and S14 compared with  
 657 Figure S15b suggests direct population of LPB from  $TT_{\text{dark}}$  is the most likely mechanism.

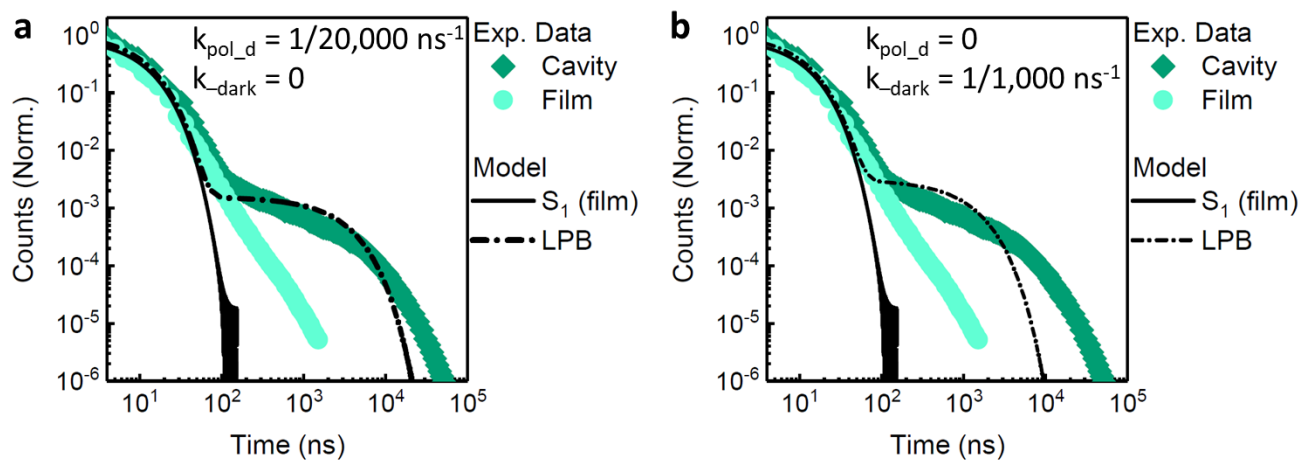

658

659 **Figure S15. a** Best fit to LPB emission using the model described above with  $k_{\text{pol}_s} = k_{\text{pol}_b} = 1/100\text{ns}^{-1}$   
 660 with all other parameters as for the model in Figure S12 (Table S2). **b** same model as in **a** but now with  
 661 no direct population from  $TT_{\text{dark}}$  ( $k_{\text{pol}_d} = 0$ ) and instead a fit for  $k_{\text{-dark}}=1/1000 \text{ ns}^{-1}$ .

662

## 663 6. Kinetic enhancement

664 Though the level of emission in our experiments is low in the time domain, the total  
665 contribution from these long-lived states is significant. To illustrate this point, in Figure S16  
666 we integrate the emission decay kinetics from the main text, normalising both curves for each  
667 material to the 'film' value for ease of comparison. Based on this simple metric, the degree of  
668 enhancement due to strong coupling (shaded) is 21% for DPPT, 64% for TIPS-tetracene and  
669 133% for DPA. If we extend the integration in TIPS-tetracene and DPA cavities to longer  
670 delays, beyond the measurable lifetime of their reference films, the enhancement rises to  
671 72% and 152%, respectively.

672

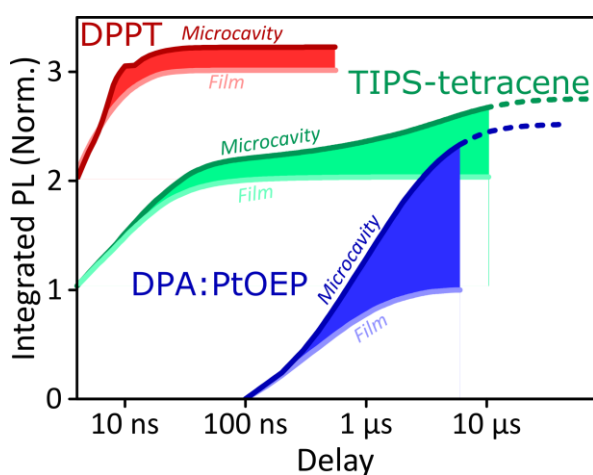

673

674 **Figure S16.** Time-integrated emission. Integral of emission kinetics in main-text Figures 2-4. For each  
675 material, both curves are normalised to the final value of the film integral, as a proxy for total film  
676 emission. Shaded region corresponds to the enhancement achieved through strong coupling.  
677 Dashed lines show continuation of microcavity emission beyond the range when film emission falls  
678 into noise.

679



## 680 7. References

- 681 1 S. A. Odom, S. R. Parkin and J. E. Anthony, *Org. Lett.*, 2003, **5**, 4245–4248.
- 682 2 C. Schweitzer and R. Schmidt, *Chem. Rev.*, 2003, **103**, 1685–757.
- 683 3 R. T. Grant, R. Jayaprakash, D. M. Coles, A. Musser, S. De Liberato, I. D. W. Samuel, G. A.  
684 Turnbull, J. Clark and D. G. Lidzey, *Opt. Express*, 2018, **26**, 3320.
- 685 4 R. Karpicz, S. Puzinas, V. Gulbinas, A. Vakhnin, A. Kadashchuk and B. P. Rand, *Chem. Phys.*,  
686 2014, **429**, 57–62.
- 687 5 H. Goudarzi and P. E. Keivanidis, *J. Phys. Chem. C*, 2014, **118**, 14256–14265.
- 688 6 R. T. Grant, P. Michetti, A. J. Musser, P. Gregoire, T. Virgili, E. Vella, M. Cavazzini, K. Georgiou,  
689 F. Galeotti, C. Clark, J. Clark, C. Silva and D. G. Lidzey, *Adv. Opt. Mater.*, 2016, **4**, 1615–1623.
- 690 7 H. L. Stern, A. Cheminal, S. R. Yost, K. Broch, S. L. Bayliss, K. Chen, M. Tabachnyk, K. Thorley,  
691 N. Greenham, J. M. Hodgkiss, J. Anthony, M. Head-Gordon, A. J. Musser, A. Rao and R. H.  
692 Friend, *Nat. Chem.*, 2017, **9**, 1205–1212.
- 693 8 H. L. Stern, A. Cheminal, S. R. Yost, K. Broch, S. L. Bayliss, K. Chen, M. Tabachnyk, K. Thorley,  
694 N. Greenham, J. M. Hodgkiss, J. Anthony, M. Head-Gordon, A. J. Musser, A. Rao and R. H.  
695 Friend, *Nat. Chem.*, 2017, **9**, 1205–1212.
- 696 9 D. Ballarini, M. De Giorgi, S. Gambino, G. Lerario, M. Mazzeo, A. Genco, G. Accorsi, C.  
697 Giansante, S. Colella, S. D’Agostino, P. Cazzato, D. Sanvitto and G. Gigli, *Adv. Opt. Mater.*,  
698 2014, **2**, 1076–1081.
- 699 10 D. M. Coles, P. Michetti, C. Clark, W. C. Tsoi, A. M. Adawi, J. Kim and D. G. Lidzey, *Adv. Funct.*  
700 *Mater.*, 2011, **21**, 3691–3696.
- 701 11 F. Herrera and F. C. Spano, *Phys. Rev. Lett.*, 2017, **118**, 223601.
- 702 12 F. Herrera and F. C. Spano, *Phys. Rev. A*, 2017, **95**, 053867.
- 703 13 L. R. Weiss, S. L. Bayliss, F. Kraffert, K. J. Thorley, J. E. Anthony, R. Bittl, R. H. Friend, A. Rao, N.  
704 C. Greenham and J. Behrends, *Nat. Phys.*, 2017, **13**, 176–181.
- 705 14 J. Aragón and A. Troisi, *Phys. Rev. Lett.*, 2015, **114**, 026402.
- 706 15 N. Nijegorodov, V. Ramachandran and D. P. Winkoun, *Spectrochim. Acta Part A Mol. Biomol.*  
707 *Spectrosc.*, 1997, **53**, 1813–1824.
- 708 16 J. J. Burdett, G. B. Piland and C. J. Bardeen, *Chem. Phys. Lett.*, 2013, **585**, 1–10.
- 709 17 H. L. Stern, A. J. Musser, S. Gelinas, P. Parkinson, L. M. Herz, M. J. Bruzek, J. Anthony, R. H.  
710 Friend and B. J. Walker, *Proc. Natl. Acad. Sci.*, 2015, **112**, 7656–7661.
- 711 18 C. K. Yong, A. J. Musser, S. L. Bayliss, S. Lukman, H. Tamura, O. Bubnova, R. K. Hallani, A.  
712 Meneau, R. Resel, M. Maruyama, S. Hotta, L. M. Herz, D. Beljonne, J. E. Anthony, J. Clark and  
713 H. Sirringhaus, *Nat. Commun.*, 2017, **8**, 15953.

714
